# Supplementary material for: Discrimination of nucleoside phosphates using principal component analysis of spectral changes in a single europium complex
Source: Royal Society of Chemistry journal article supplement (doi:10.1039/d4cc05815a), 2024-12-20
Supplement: d4cc05815a1.pdf [file d4cc05815a1.pdf]

*Supplementary information for*

## **Discrimination of nucleoside phosphates using principal component analysis of spectral changes in a single europium complex**

Leila R. Hill,<sup>a,b,c,\*</sup> Elizabeth J. New,<sup>b,c,d</sup> Stephen Faulkner<sup>a</sup>

- a. Department of Chemistry, University of Oxford, Chemistry Research Laboratory, Mansfield Road, Oxford, UK.
- b. School of Chemistry, The University of Sydney, Sydney, NSW, 2006, Australia.
- c. Australian Research Council Centre of Excellence for Innovations in Peptide and Protein Science, The University of Sydney, Sydney, NSW, 2006, Australia.
- d. Sydney Nano Institute, The University of Sydney, Sydney, NSW, 2006, Australia.

Email: leila.hill@sydney.edu.au

### **Contents**

|                                                                                                                            |     |
|----------------------------------------------------------------------------------------------------------------------------|-----|
| 1. Materials and instrumental details .....                                                                                | S2  |
| 2. Experimental methods .....                                                                                              | S2  |
| 3. Synthetic details .....                                                                                                 | S3  |
| 1,4,7,10-Tetraazacyclododecane-1,4,7-triacetate <i>tert</i> -butyl triester · HBr ( <b>1</b> ) .....                       | S3  |
| $\alpha$ -(DO3A <i>tert</i> -butyl triester)-3-methylnitrobenzene ( <sup>t</sup> Bu <sub>3</sub> . <b>NmnbDO3A</b> ) ..... | S3  |
| $\alpha$ -(H <sub>3</sub> .DO3A)-3-methylnitrobenzene · 2TFA (H <sub>3</sub> . <b>NmnbDO3A</b> ) .....                     | S4  |
| $\alpha$ -(Eu.DO3A)-3-methylnitrobenzene · 3NaOTf (Eu. <b>NmnbDO3A</b> ) .....                                             | S5  |
| 4. Supplementary figures .....                                                                                             | S6  |
| 5. References .....                                                                                                        | S18 |
| 6. Full titration data .....                                                                                               | S19 |

## 1. Materials and instrumental details

NMR spectra were recorded with a Bruker AVIIIHD 400 NanoBay, Bruker AVII 500, Bruker AVII 500 with  $^{13}\text{C}$  detect He CryoProbe™, Bruker AVIIIHD 500, or Bruker AVIIIHD 600 with broadband Prodigy CryoProbe™.

Mass spectrometry used a Waters LCT Premier or an Agilent 6120 mass spectrometer equipped with Agilent 1260 LC pump and CTC autosampler, and high resolution and accurate mass spectra were performed by staff at the Chemistry Research Laboratory, University of Oxford, using a Bruker  $\mu\text{TOF}$  or Waters Micromass® GCT.

CHN elemental analysis was performed Mrs Birgitta Kegel at the University of Copenhagen, Denmark.

UV-vis absorption spectra used a PerkinElmer Lambda 750S. Spectra were measured in solution using pure water as the baseline.

Luminescence data was measured using a Horiba FluoroLog-3 and processed using FluorEssence™, OriginLab Origin®, a custom-written Microsoft Excel macro, and DynaFit®.<sup>1</sup>

Reagents were laboratory grade and obtained from standard commercial sources including Sigma-Aldrich, Fisher Scientific, Alfa Aesar, Fluorochem, and CheMatech. Water was deionised and microfiltered with a Milli-Q Millipore machine.

Principal component analysis was performed using Quasar 1.9.1 (Orange), and graphs were plotted in OriginLab Origin®.

## 2. Experimental methods

### 2.1 Titration experiments

Stock solutions ( $2.6 \times 10^{-4}$  M) of the europium complex were made up in aqueous HEPES buffer solution (0.1 M) and the pH adjusted to 7.4 with a Hanna benchtop pH meter ( $\pm 0.01$  pH units) with microlitres of concentrated  $\text{HCl}_{(\text{aq})}$  or  $\text{NaOH}_{(\text{aq})}$ . Stock solutions of AMP ( $1.6 \times 10^{-2}$  M), ADP ( $1.6 \times 10^{-2}$  M), and ATP ( $1.7 \times 10^{-2}$  M) were made using the europium complex stock solution as the solvent, to ensure that the europium complex concentration was kept constant so that the luminescence intensity was not altered by dilution. All solids for the solutions were weighed out on a balance ( $\pm 0.01$  mg).

1.00 mL of the europium complex stock solution was added to a 1.5 mL cuvette with a volume-displacement micropipette. During the titration, successive emission spectra were recorded as 2 to 130  $\mu\text{L}$  aliquots of the nucleoside phosphate stock solution were added using a volume-displacement micropipette. Titrations were carried out at room temperature on the same day. All solutions were allowed to equilibrate to room temperature before use.

### 2.2 Principal component analysis

Raw spectra were processed using Quasar 1.9.1 (Orange). Full spectra were first subjected to linear baseline correction, followed by Gaussian smoothing ( $\text{SD} = 1$ ), and finally area

normalisation. Processed spectral data was then subjected to principal component analysis (PCA).

### 3. Synthetic details

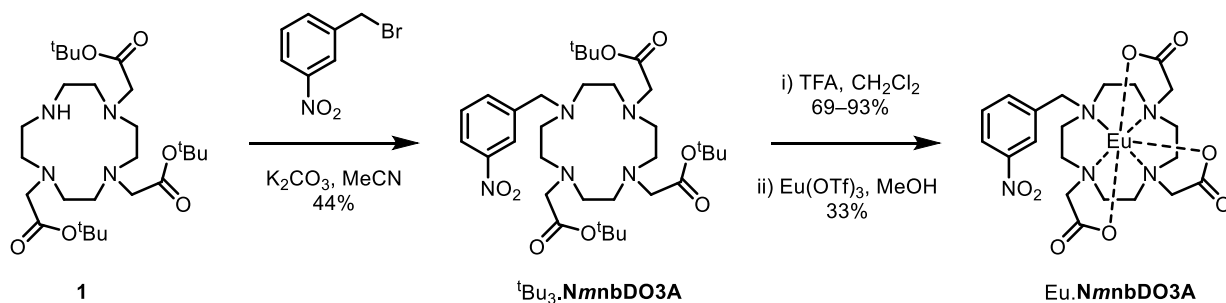

**Scheme S1:** Synthesis of complex Eu.NmnbDO3A.

#### 1,4,7,10-Tetraazacyclododecane-1,4,7-triacetate *tert*-butyl triester · HBr (1)

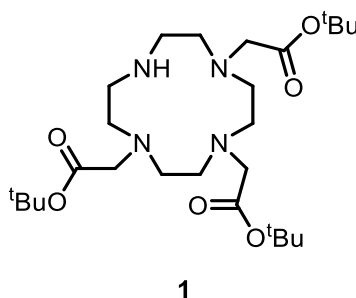

Prepared according to the procedure described by Dadabhoy *et al.*<sup>2</sup>

Yield: 8.76 g, 42%. <sup>1</sup>H NMR (CDCl<sub>3</sub>, 400 MHz) δ (ppm) 10.02 (1H, br. s, NH), 3.36 (4H, s, NCH<sub>2</sub>CO), 3.28 (2H, s, NCH<sub>2</sub>CO), 3.09 (4H, br. m, ring NCH<sub>2</sub>), 2.89 (12H, br. m, ring NCH<sub>2</sub>), 1.44 (27H, s, 3 × <sup>t</sup>Bu). <sup>13</sup>C NMR (CDCl<sub>3</sub>, 101 MHz) δ (ppm) 170.61, 169.72, 81.96, 81.80, 58.35, 51.49, 51.37, 49.33, 48.92, 47.65, 28.36 (1 × <sup>t</sup>Bu), 28.32 (2 × <sup>t</sup>Bu). ES<sup>+</sup> MS (*m/z*) 515 ([M + H]<sup>+</sup>), 537 ([M + Na]<sup>+</sup>). ES<sup>-</sup> MS (*m/z*) 515 (M<sup>-</sup>).

#### $\alpha$ -(DO3A *tert*-butyl triester)-3-methylnitrobenzene (<sup>t</sup>Bu<sub>3</sub>.NmnbDO3A)

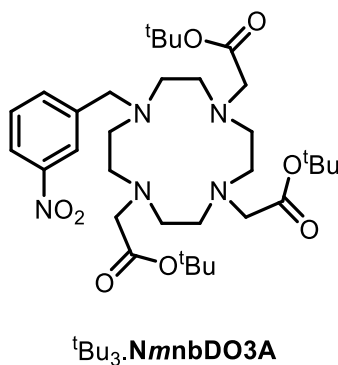

3-Nitrobenzylbromide (0.42 g, 1.94 mmol), compound **1** · HBr (1.00 g, 1.68 mmol), and potassium carbonate (1.30 g, 9.41 mmol) were combined in anhydrous acetonitrile (50 mL)

and the mixture stirred at 55°C for 3.5 hours. The white suspension was filtered to remove inorganic salts and the resulting yellow solution evaporated under reduced pressure. The light yellow solid was dissolved in dichloromethane (30 mL) and washed with brine (3 × 30 mL). The organic layer was dried over anhydrous sodium sulphate, filtered, and the filtrate concentrated to dryness under reduced pressure. The crude product was purified by silica gel column chromatography in 19:1 dichloromethane:methanol, yielding a static very pale yellow solid (482 mg, 44%).

<sup>1</sup>H NMR (CDCl<sub>3</sub>, 400 MHz) δ (ppm) 8.71 (1H, t, *J*=2.1 Hz, Ar-H2), 8.13 (1H, ddd, *J*=7.9, 2.1, 1.2 Hz, Ar-H4), 7.76 (1H, dt, *J*=7.9, 1.2 Hz, Ar-H6), 7.53 (1H, t, *J*=7.9 Hz, Ar-H5), 3.98 – 1.98 (24H, br. m, NCH<sub>2</sub>), 1.42 (27H, br. s, 3 × <sup>t</sup>Bu). <sup>13</sup>C NMR (CDCl<sub>3</sub>, 126 MHz) δ (ppm) 173.45, 172.51, 148.53, 139.60, 137.10, 129.54, 124.71, 122.51, 83.10, 82.55, 58.76, 55.93, 55.59, 27.79. ES<sup>+</sup> MS (*m/z*) 650 ([M + H]<sup>+</sup>), 672 ([M + Na]<sup>+</sup>), 594 ([M – <sup>t</sup>Bu + 2H]<sup>+</sup>), 538 ([M – 2<sup>t</sup>Bu + 3H]<sup>+</sup>), 482 ([M – 3<sup>t</sup>Bu + 4H]<sup>+</sup>).

### **α-(H<sub>3</sub>.DO3A)-3-methylnitrobenzene · 2TFA (H<sub>3</sub>.NmnbDO3A)**

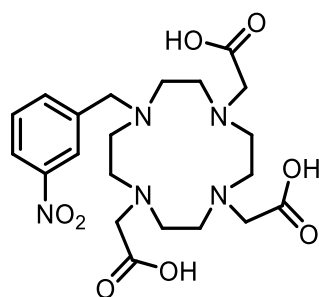

**H<sub>3</sub>.NmnbDO3A**

<sup>t</sup>Bu<sub>3</sub>.NmnbDO3A (100 mg, 0.15 mmol) was dissolved in dichloromethane (2 mL) and trifluoroacetic acid (2 mL) added dropwise to the stirring solution. The reaction mixture was stirred at room temperature for 26 hours, monitored by mass spectrometry. The solvent was removed under reduced pressure. Residual trifluoroacetic acid was co-evaporated with methanol three times. The crude product was dissolved in the minimum amount of methanol and precipitated with excess diethyl ether, and the diethyl ether removed by decantation. The methanol-diethyl ether trituration was performed three times. The resulting white powder was dried under reduced pressure (75 mg, 69%).

<sup>1</sup>H NMR (MeOD, 400 MHz) δ (ppm) 8.37 (1H, s, Ar-H2), 8.23 (1H, d, *J*=8.2 Hz, Ar-H4), 8.07 (1H, d, *J*=7.8 Hz, Ar-H6), 7.60 (1H, t, *J*=7.8 Hz, Ar-H5), 4.23 (2H, br. s, ArCH<sub>2</sub>), 3.55 (22H, br. m, CH<sub>2</sub> cyclen ring, CH<sub>2</sub>CO). ES<sup>+</sup> MS (*m/z*) 482 ([M + H]<sup>+</sup>), 504 ([M + Na]<sup>+</sup>). ESI<sup>+</sup> HRMS (*m/z*) calculated: 482.22454, measured: 482.22448 [C<sub>21</sub>H<sub>32</sub>N<sub>5</sub>O<sub>8</sub>]<sup>+</sup> ([M + H]<sup>+</sup>). Elemental calculated: C, 42.32; H, 4.69; N, 9.87; measured: C, 40.51; H, 4.97; N, 9.84; [C<sub>25</sub>H<sub>33</sub>F<sub>6</sub>N<sub>5</sub>O<sub>12</sub>] (M · 2TFA).

**$\alpha$ -(Eu.DO3A)-3-methylnitrobenzene · 3NaOTf (Eu.NmnbDO3A)**

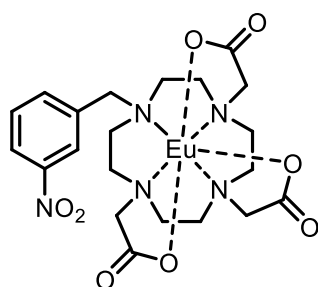

**Eu.NmnbDO3A**

H<sub>3</sub>.NmnbDO3A · 2TFA (45 mg, 0.063 mmol) and europium triflate (59 mg, 0.098 mmol) were combined in methanol (5 mL) and stirred at 60°C for 21 hours, then adjusted to pH 5 by dropwise addition of aqueous sodium hydroxide (1.0 M) and further reacted at 60°C for 5 days. The methanol was removed under reduced pressure, the resulting suspension dissolved in water and adjusted to pH 10 by dropwise addition of aqueous sodium hydroxide (1.0 M). The resulting suspension was centrifuged and the supernatant filtered through an Acrodisc® syringe filter (0.2 μm), neutralised to pH 7 by dropwise addition of aqueous hydrochloric acid (1.0 M), and the water removed under reduced pressure followed by desiccation. The salt content of the crude product was reduced by dialysis in a Float-A-Lyzer® G2. The water was removed under reduced pressure and the product dried in a desiccator (24 mg, 33%).

<sup>1</sup>H NMR (D<sub>2</sub>O, 400 MHz) δ (ppm) 37.43, 27.82, 27.77, 17.49, 12.84, -2.31, -5.15, -10.04, -10.06, -11.94, -15.31, -16.66, -18.67, -19.32, -20.63, -24.10, -24.42, -25.33. Only major resolved peaks outside the +10 to 0 ppm range are reported. ES<sup>+</sup> MS (*m/z*) 632 ([M + H]<sup>+</sup>), 1261 ([2M + H]<sup>+</sup>). ESI<sup>+</sup> HRMS (*m/z*) calculated: 632.1223, measured: 632.1210 [C<sub>21</sub>H<sub>29</sub>EuN<sub>5</sub>O<sub>8</sub>]<sup>+</sup> ([M + H]<sup>+</sup>). UV-vis (H<sub>2</sub>O) λ (I/I<sub>max</sub>) 204 (1.00), 268 (0.48) nm.

#### 4. Supplementary figures

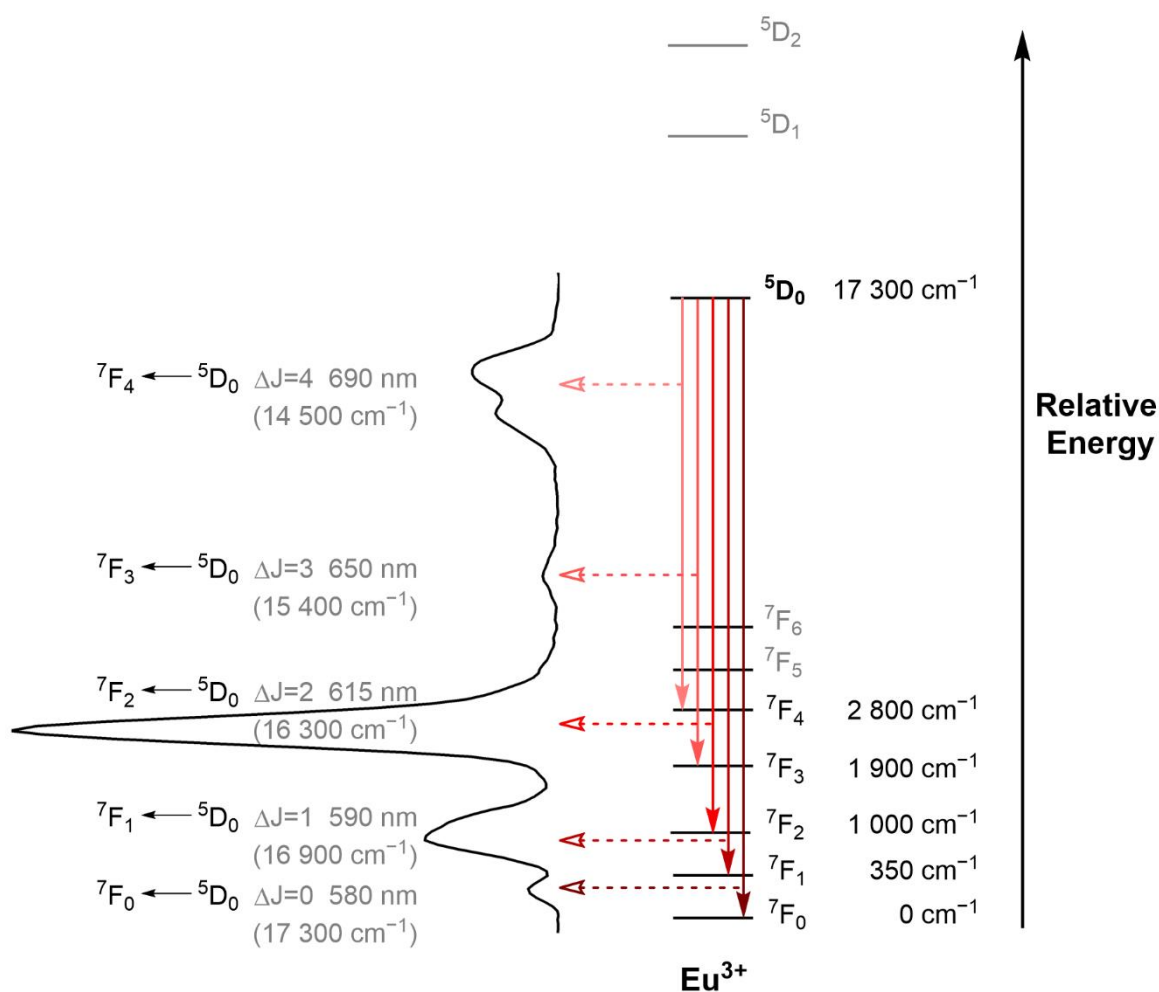

**Figure S1:** Partial energy level diagram outlining relevant transitions for  $\text{Eu}^{3+}$  complexes.

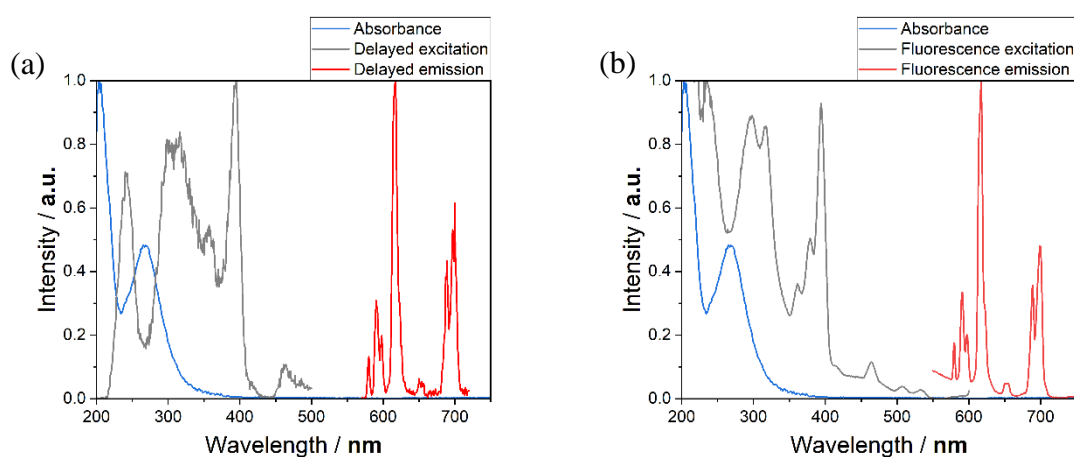

**Figure S2:** UV-vis absorption (blue traces), (a) time-gated luminescence ( $\lambda_{\text{ex}} = 394 \text{ nm}$ ,  $\lambda_{\text{em}} = 616 \text{ nm}$ , delay time 0.10 ms, sample window 0.2 ms), (b) steady state fluorescence ( $\lambda_{\text{ex}} = 394 \text{ nm}$ ,  $\lambda_{\text{em}} = 616 \text{ nm}$ ) excitation (grey traces) and emission (red traces).

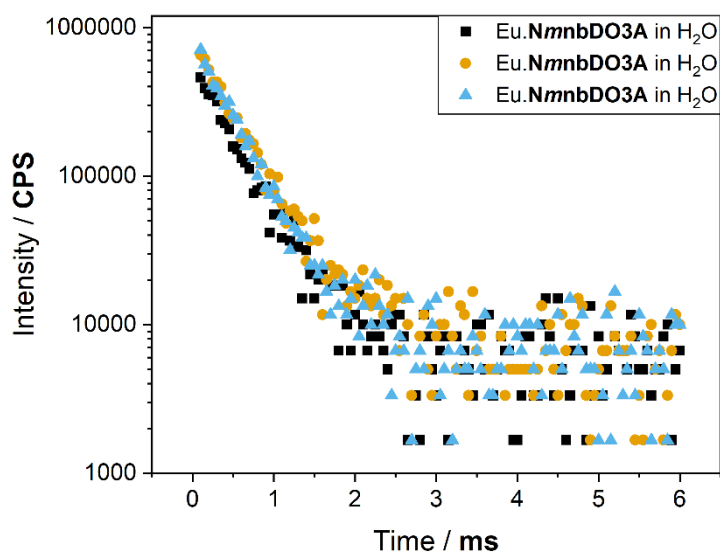

**Figure S3:** Eu.*NmbDO3A* luminescence lifetime in H<sub>2</sub>O.  $\tau = 0.41$  ms.

$\lambda_{\text{ex}} = 394$  or  $230$  nm,  $s.w._{\text{ex}} = 14$  nm,  $\lambda_{\text{em}} = 616$  nm,  $s.w._{\text{em}} = 14$  or  $10$  or  $5$  nm, sample window  $0.2$  ms, time per flash  $41.00$  ms, flash count  $10$ ,  $3$  averaged scans.

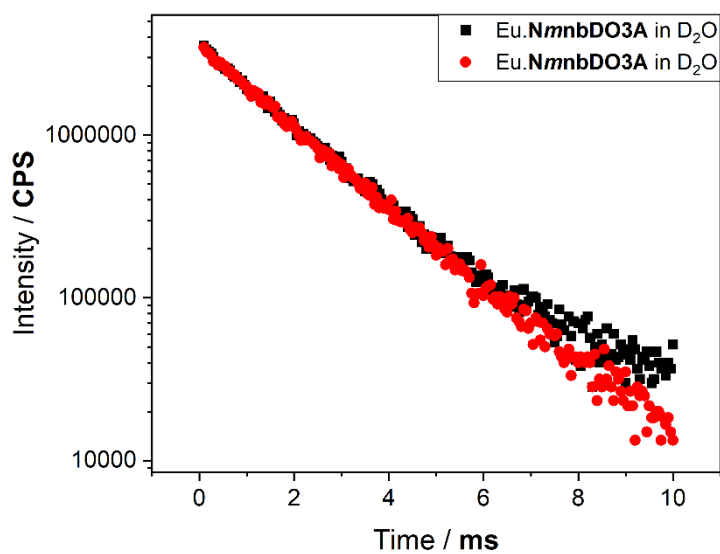

**Figure S4:** Eu.*NmbDO3A* luminescence lifetime in D<sub>2</sub>O.  $\tau = 1.70$  ms.

$\lambda_{\text{ex}} = 394$  nm,  $s.w._{\text{ex}} = 14$  nm,  $\lambda_{\text{em}} = 616$  nm,  $s.w._{\text{em}} = 14$  nm, sample window  $0.2$  ms, time per flash  $41.00$  ms, flash count  $10$ ,  $3$  averaged scans.

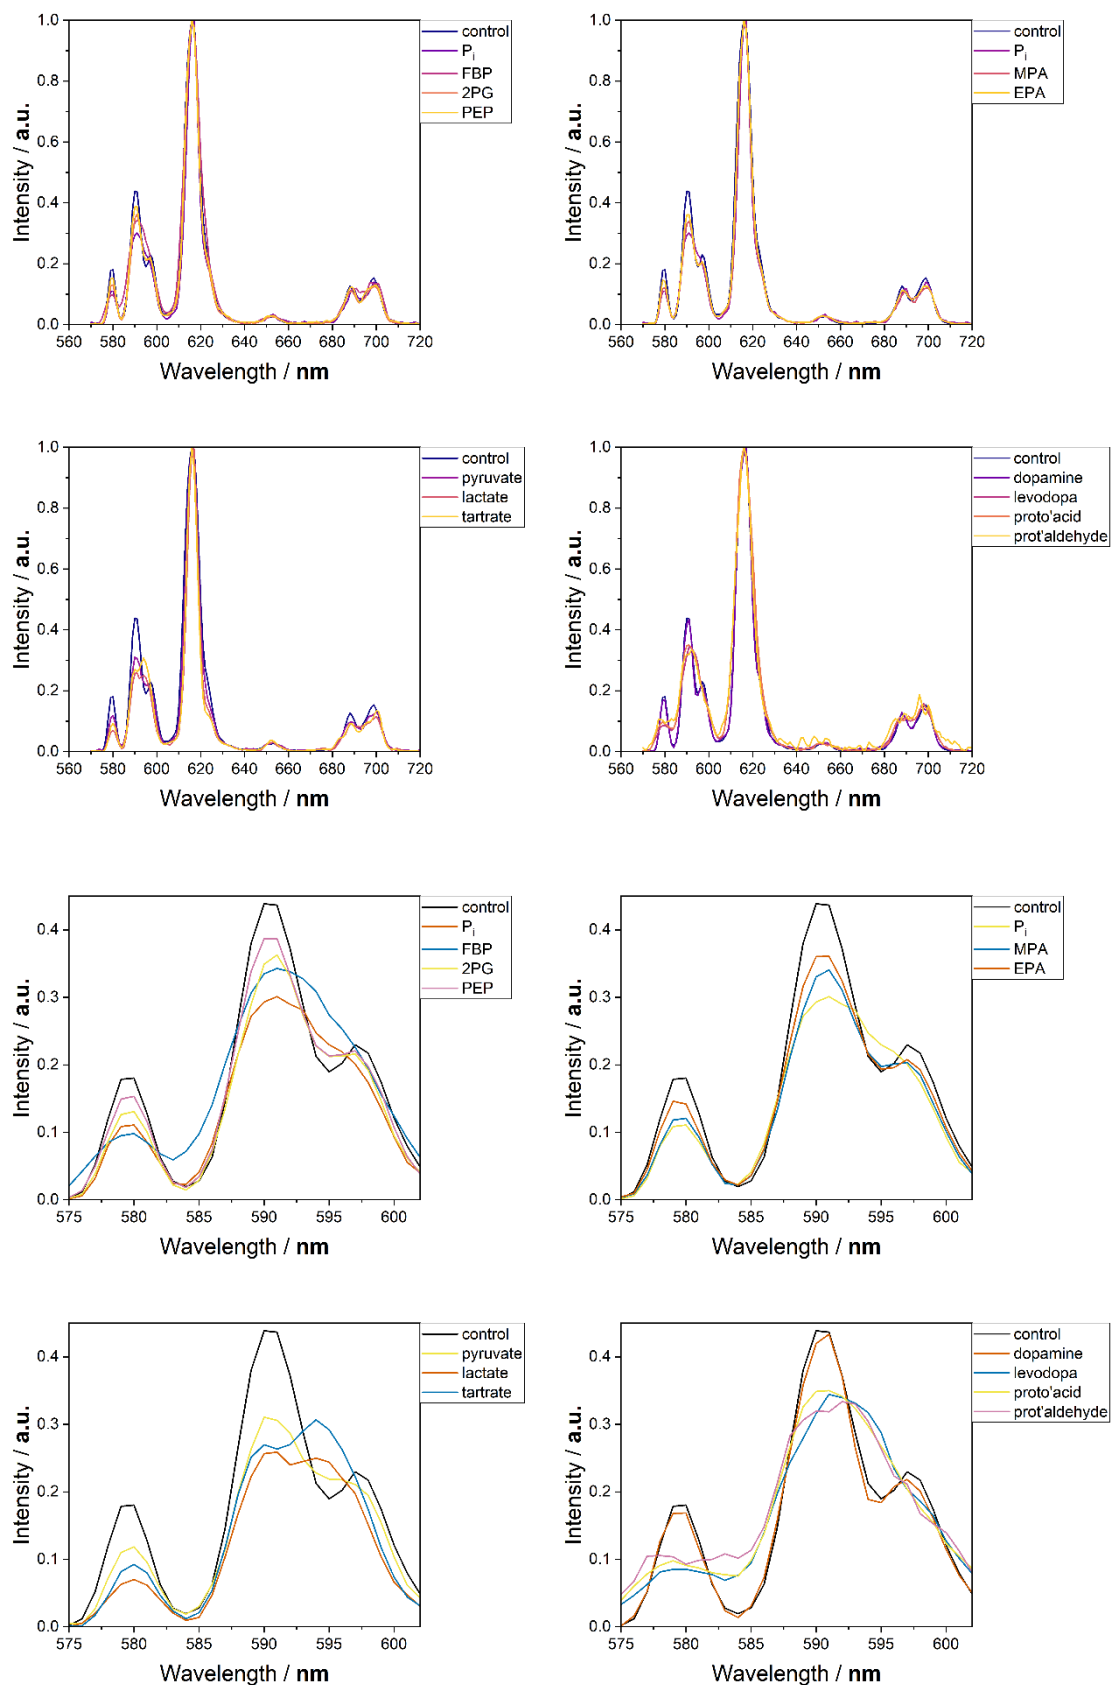

**Figure S5:** Average spectra for each condition for  $\text{Eu.NmnbdO3A}$  with other anionic guests. Top: full emission spectra, bottom:  $\Delta J=0$  peak and fine structure in  $\Delta J=1$  peak.  $\text{P}_i$  = inorganic phosphate, FBP = *D*-fructose 1,6-bisphosphate, 2PG = *D*(+)-2-phosphoglycerate, PEP = phospho(enol)pyruvate, MPA = methylphosphonate, EPA = ethylphosphonate, proto'acid = 3,4-dihydroxybenzoic acid, prot'aldehyde = 3,4-dihydroxybenzaldehyde.



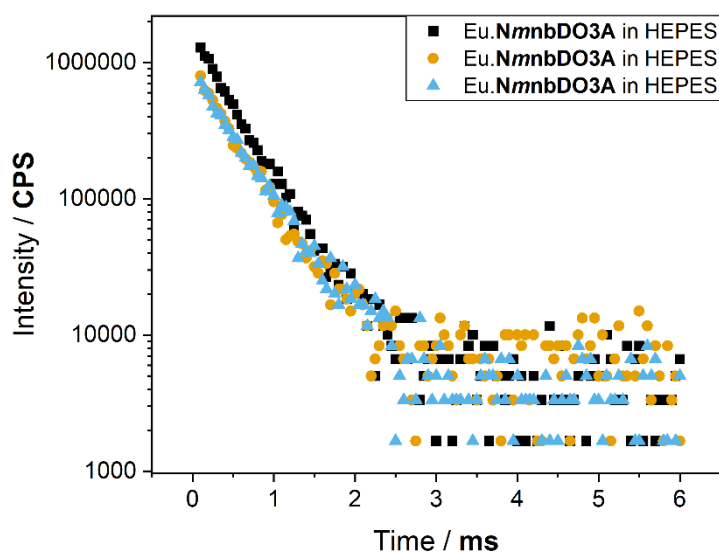

**Figure S6:** Eu.*NmbDO3A* luminescence lifetime in HEPES solution at pH 7.4.  $\tau = 0.41$  ms. [Eu.*NmbDO3A*] = 0.26 mM,  $\lambda_{\text{ex}} = 394$  nm, s.w.<sub>ex</sub> = 14 nm,  $\lambda_{\text{em}} = 616$  nm, s.w.<sub>em</sub> = 5 or 4 nm, sample window 0.2 ms, time per flash 41.00 ms, flash count 10, 3 averaged scans.

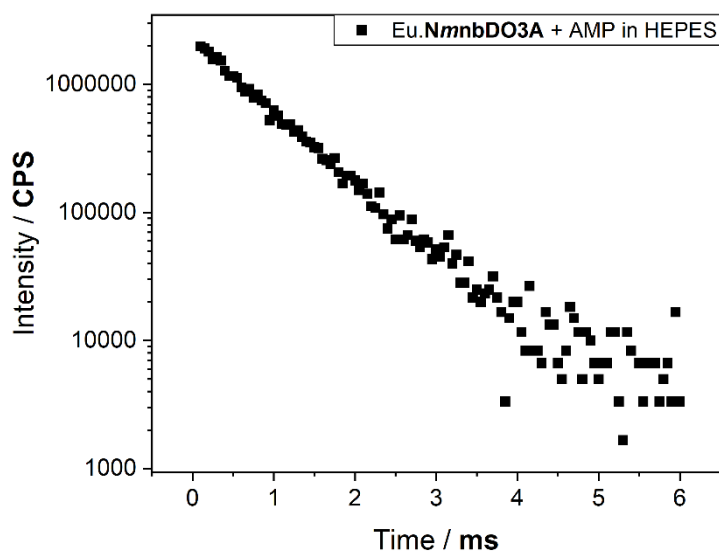

**Figure S7:** Eu.*NmbDO3A* + AMP luminescence lifetime in HEPES solution at pH 7.4.  $\tau = 0.74$  ms. [Eu.*NmbDO3A*] = 0.26 mM, [AMP] = 4.8 mM (18 equivalents),  $\lambda_{\text{ex}} = 394$  nm, s.w.<sub>ex</sub> = 14 nm,  $\lambda_{\text{em}} = 616$  nm, s.w.<sub>em</sub> = 5 nm, sample window 0.2 ms, time per flash 41.00 ms, flash count 10, 3 averaged scans.

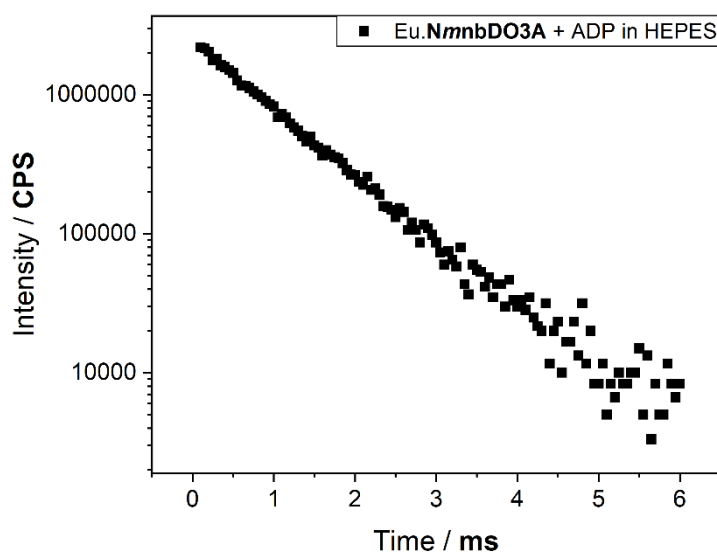

**Figure S8:** Eu.NmnbDO3A + ADP luminescence lifetime in HEPES solution at pH 7.4.  
 $\tau = 0.87$  ms.

[Eu.NmnbDO3A] = 0.26 mM, [ADP] = 4.9 mM (19 equivalents),  $\lambda_{\text{ex}} = 394$  nm, s.w.ex = 14 nm,  $\lambda_{\text{em}} = 616$  nm, s.w.em = 5 nm, sample window 0.2 ms, time per flash 41.00 ms, flash count 10, 3 averaged scans.

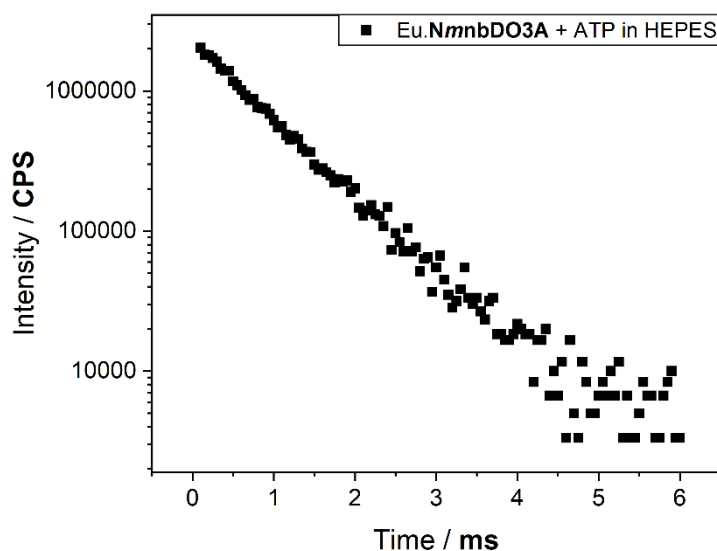

**Figure S9:** Eu.NmnbDO3A + ATP luminescence lifetime in HEPES solution at pH 7.4.  
 $\tau = 0.76$  ms.

[Eu.NmnbDO3A] = 0.26 mM, [ATP] = 5.1 mM (20 equivalents),  $\lambda_{\text{ex}} = 394$  nm, s.w.ex = 14 nm,  $\lambda_{\text{em}} = 616$  nm, s.w.em = 5 nm, sample window 0.2 ms, time per flash 41.00 ms, flash count 10, 3 averaged scans.

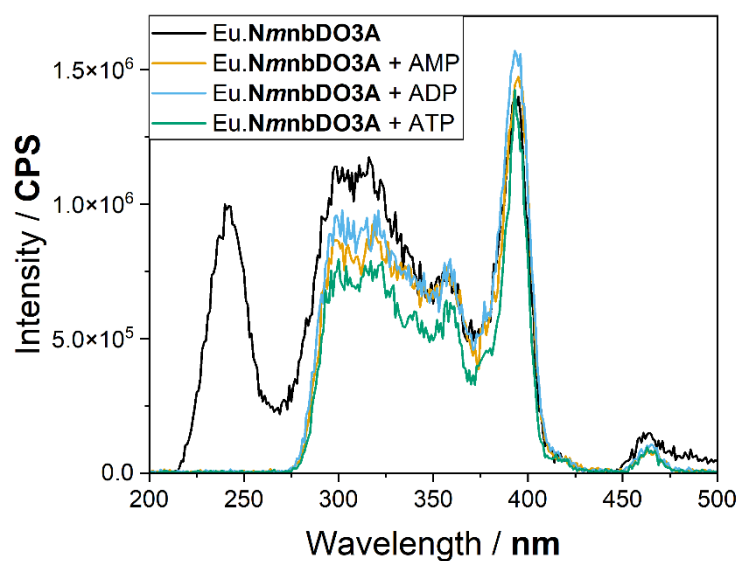

**Figure S10:** Change in excitation spectrum upon addition of 19 equivalents of adenosine guest to a 0.26 mM solution of Eu.**NmbDO3A** in 0.1 M HEPES buffer at pH 7.4.  $\lambda_{em} = 616$  nm, s.w.<sub>ex</sub> = 14 nm (Eu.**NmbDO3A** alone, with AMP, with ADP) or 12 nm (with ATP), s.w.<sub>em</sub> = 4 nm, flash delay: 0.10 ms, sample window: 0.20 ms, time per flash: 41.00 ms, flash count: 10, integration time 100.00 ms, 3 averaged scans.

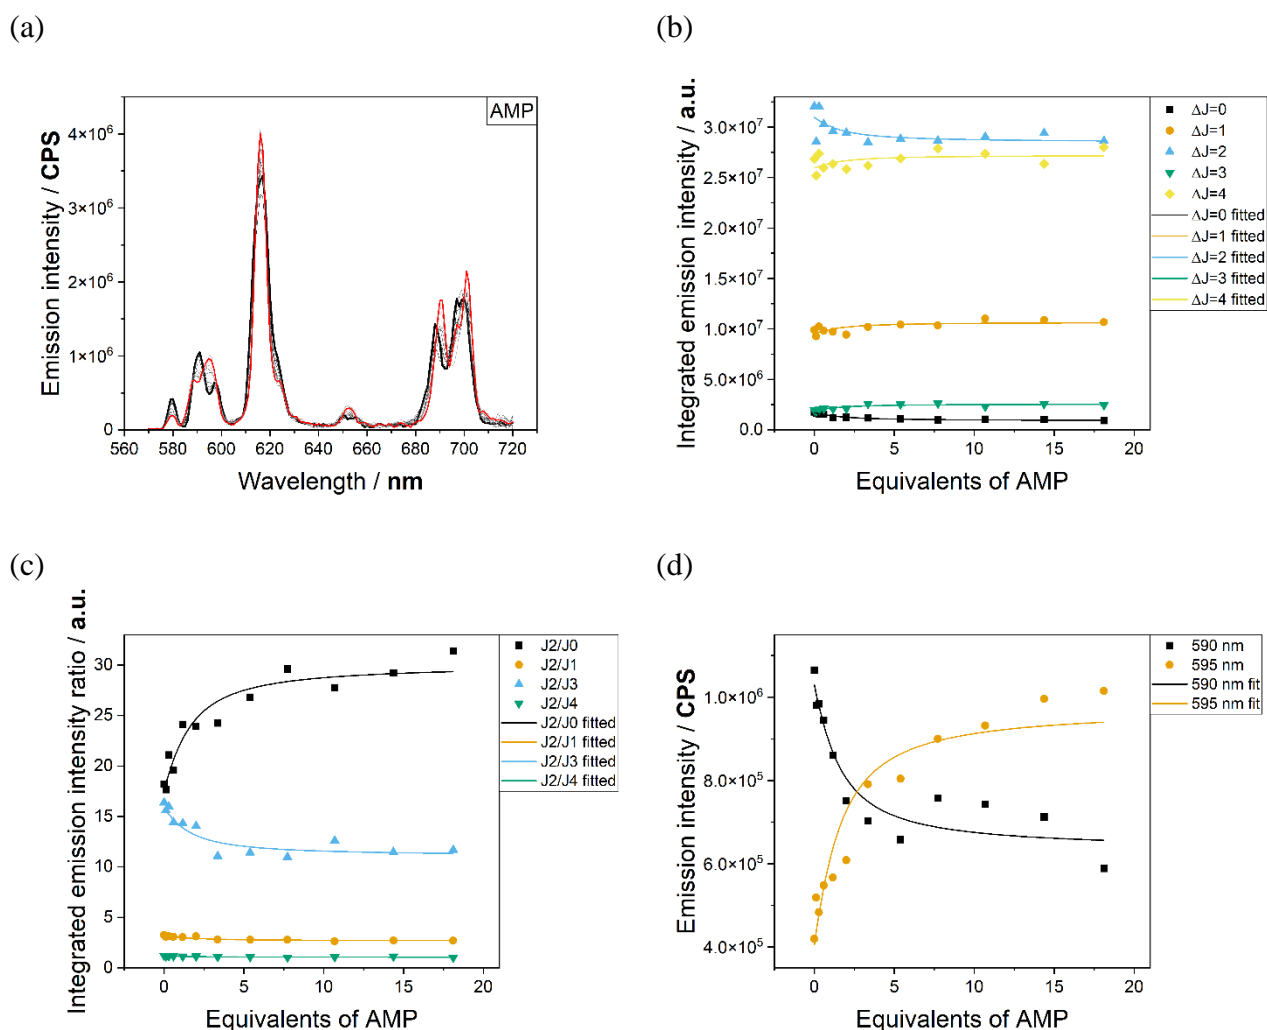

**Figure S11:** Titration data for Eu.NmbDO3A + AMP.

(a) Overlaid luminescence emission spectra for titrations of Eu.NmbDO3A with AMP (black trace at start, to grey, to red trace at end) in HEPES at pH 7.4, with data correction files applied for detector sensitivity at longer wavelengths.  $\lambda_{\text{ex}} = 394 \text{ nm}$ ,  $\text{s.w.}_{\text{ex}} = 14 \text{ nm}$ ,  $\text{s.w.}_{\text{em}} = 3 \text{ nm}$ , flash delay: 0.10 ms, sample window: 0.20 ms, time per flash: 41.00 ms, flash count: 10, integration time 100.0 ms, 5 averaged scans, with 5 points Savitzky-Golay smoothing applied.

(b) Binding isotherms from integration of europium emission peaks.

(c) Binding isotherms from ratios of integration of hypersensitive  $\Delta J=2$  peak relative to other peaks.

(d) Binding isotherms from intensities at wavelengths relevant to the splitting of the  $\Delta J=1$  peak.

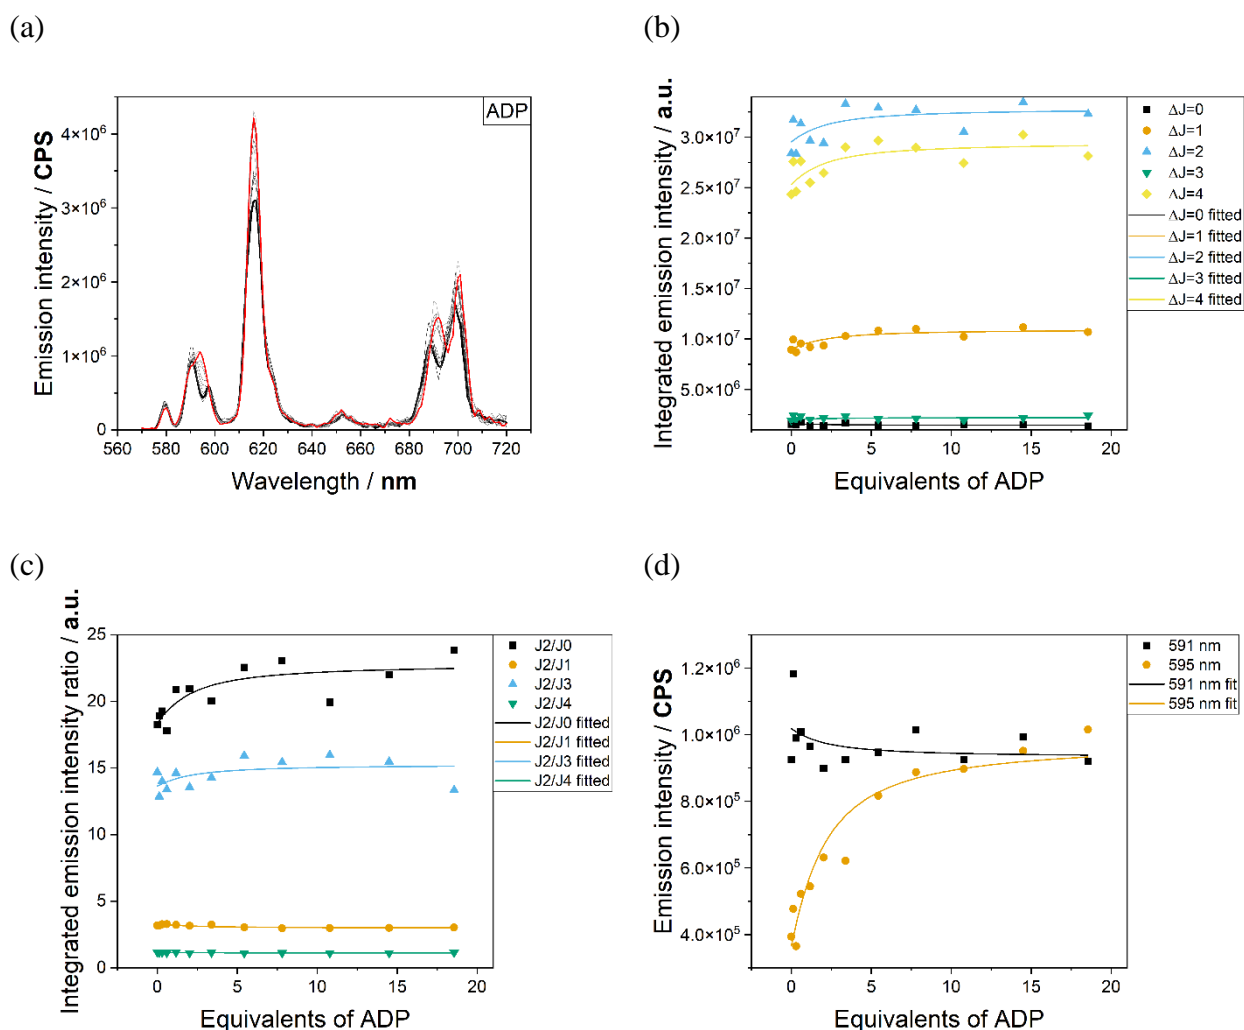

**Figure S12:** Titration data for Eu.NmnbdO3A + ADP.

(a) Overlaid luminescence emission spectra for titrations of Eu.NmnbdO3A with ADP (black trace at start, to grey, to red trace at end) in HEPES at pH 7.4, with data correction files applied for detector sensitivity at longer wavelengths.  $\lambda_{ex} = 394$  nm, s.w.ex = 14 nm, s.w.em = 3 nm, flash delay: 0.10 ms, sample window: 0.20 ms, time per flash: 41.00 ms, flash count: 10, integration time 100.0 ms, 5 averaged scans, with 5 points Savitzky-Golay smoothing applied.

(b) Binding isotherms from integration of europium emission peaks.

(c) Binding isotherms from ratios of integration of hypersensitive  $\Delta J=2$  peak relative to other peaks.

(d) Binding isotherms from intensities at wavelengths relevant to the splitting of the  $\Delta J=1$  peak.

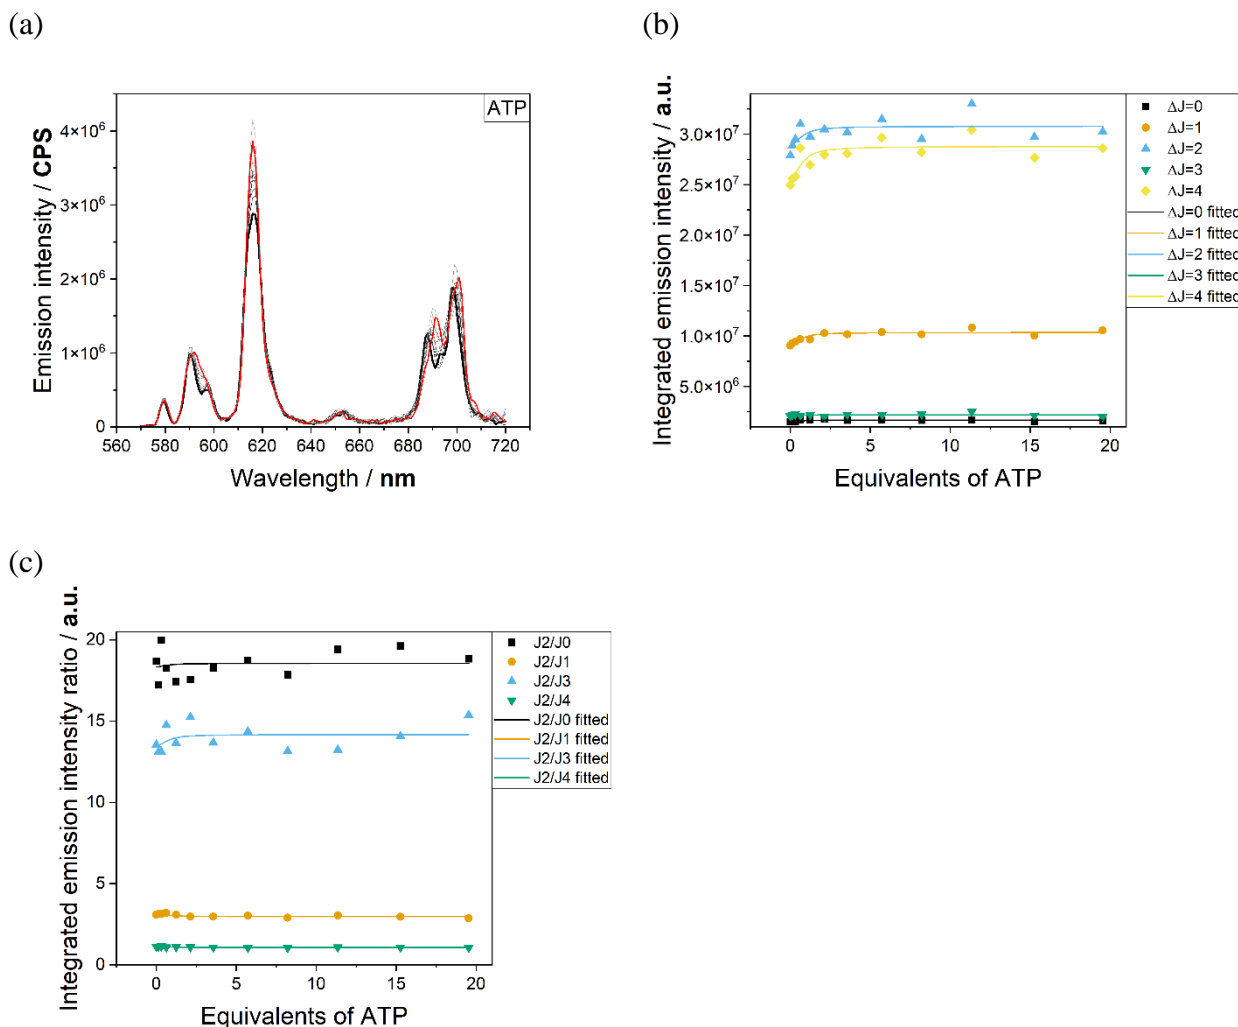

**Figure S13:** Titration data for Eu.NmnbDO3A + ATP.

(a) Overlaid luminescence emission spectra for titrations of Eu.NmnbDO3A with ATP (black trace at start, to grey, to red trace at end) in HEPES at pH 7.4, with data correction files applied for detector sensitivity at longer wavelengths.  $\lambda_{ex} = 394$  nm, s.w.<sub>ex</sub> = 14 nm, s.w.<sub>em</sub> = 3 nm, flash delay: 0.10 ms, sample window: 0.20 ms, time per flash: 41.00 ms, flash count: 10, integration time 100.0 ms, 5 averaged scans, with 5 points Savitzky-Golay smoothing applied.

(b) Binding isotherms from integration of europium emission peaks.

(c) Binding isotherms from ratios of integration of hypersensitive  $\Delta J=2$  peak relative to other peaks.

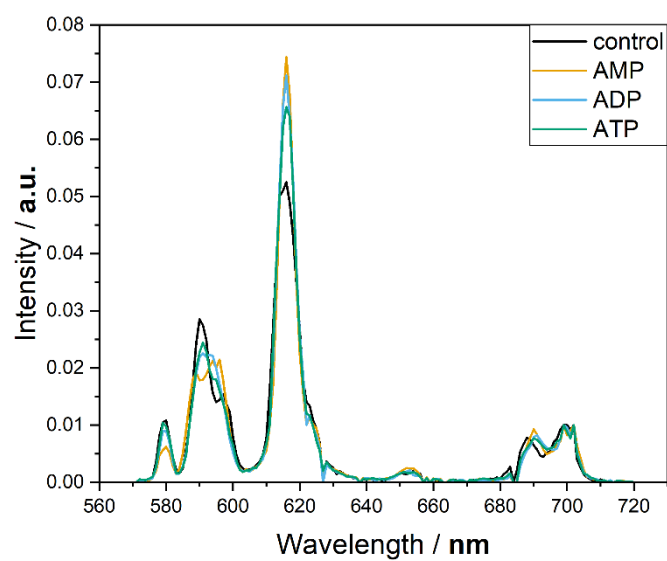

**Figure S14:** Average spectra for each condition.

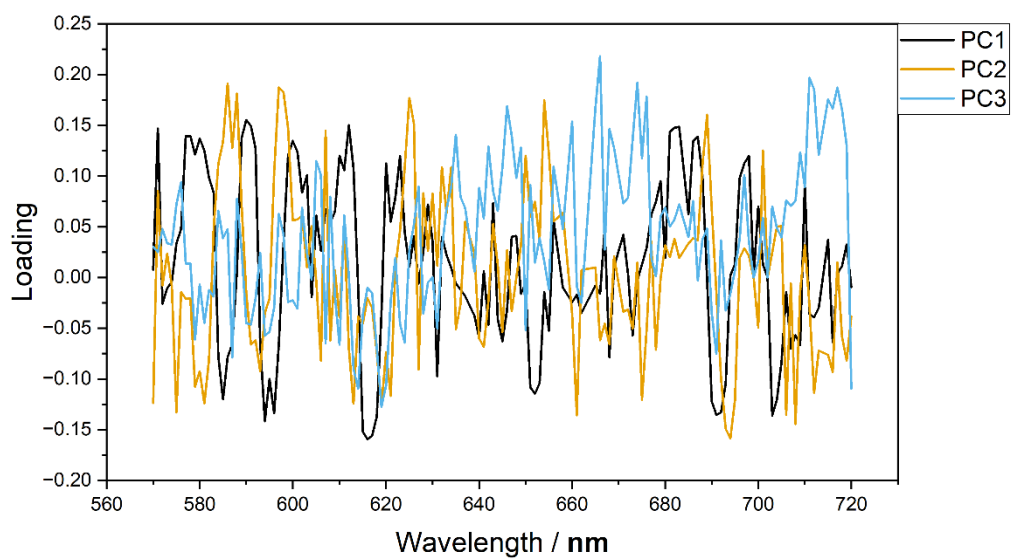

**Figure S15:** PCA scores plot against wavelengths.

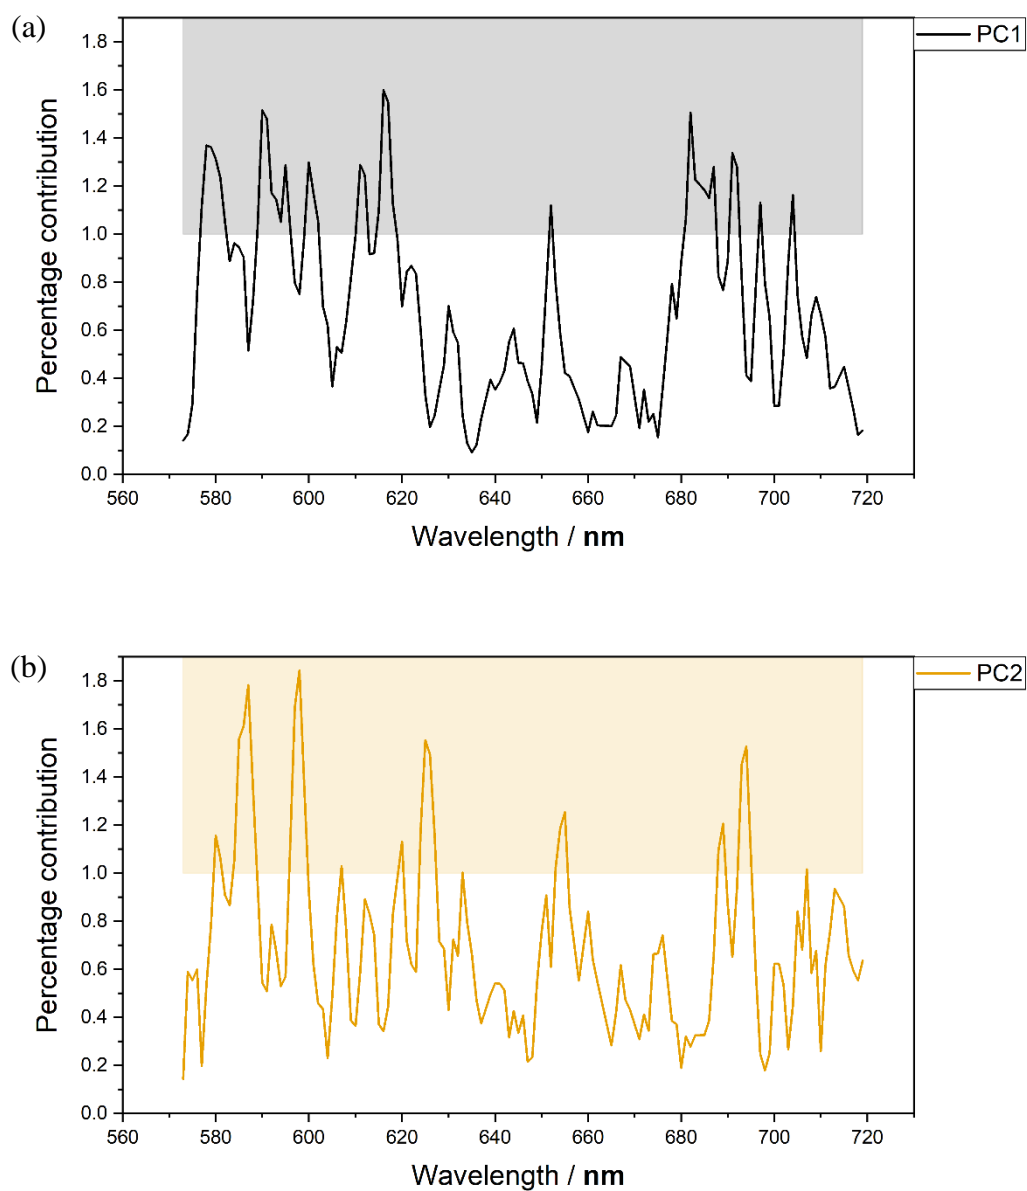

**Figure S16:** Percentage contribution of each wavelength to (a) principal component 1 (PC1) and (b) principal component 2 (PC2). Three-point smoothing applied, absolute values of loadings taken. Shaded area signifies wavelengths that contribute to more than 1% of the respective PC.



(a)

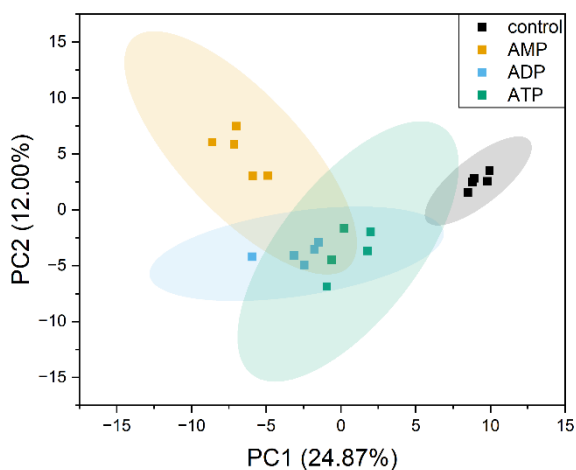

(b)

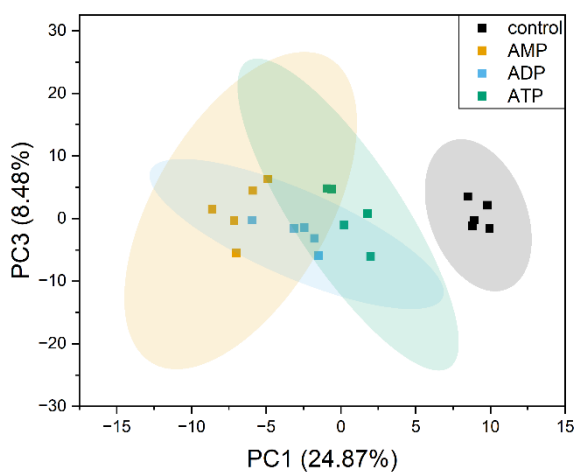

(c)

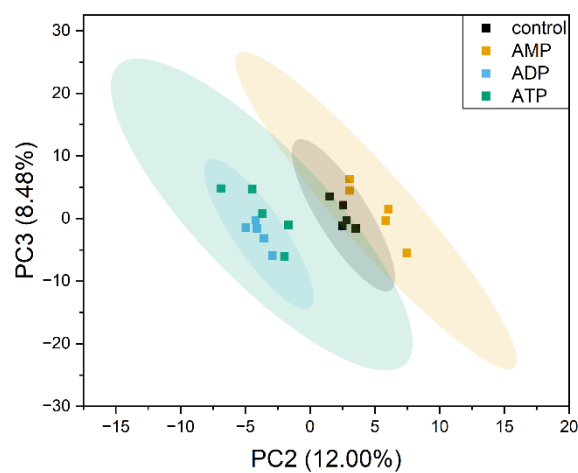

**Figure S17:** Plot of (a) PC2 vs PC1, (b) PC3 vs PC1, and (c) PC3 vs PC2 for the principal component analysis of baseline-corrected and area normalised spectra of Eu.*NmbDO3A* (control) and Eu.*NmbDO3A* treated with AMP, ADP, and ATP (5–20 equivalents). 0.26 mM Eu.*NmbDO3A* in 0.1 M HEPES buffer,  $\lambda_{\text{ex}} = 394$  nm. Ellipses represent 95% confidence intervals.

**Table S1:** Contribution of components to variance of data.

|      | % variance | cumulative variance |
|------|------------|---------------------|
| PC1  | 24.87      | 24.87               |
| PC2  | 12.00      | 36.88               |
| PC3  | 8.48       | 45.35               |
| PC4  | 5.79       | 51.14               |
| PC5  | 5.10       | 56.24               |
| PC6  | 4.87       | 61.11               |
| PC7  | 4.59       | 65.71               |
| PC8  | 4.16       | 69.86               |
| PC9  | 3.82       | 73.68               |
| PC10 | 3.53       | 77.20               |

**Table S2:** PC loadings for the major peaks in the Eu.*NmnbDO3A* spectrum.

| Wavelength<br>/ nm | Assignment                          | PC1      | PC2     | PC3      |
|--------------------|-------------------------------------|----------|---------|----------|
| 580                | $\Delta J=0$                        | 0.137    | -0.0926 | -0.00688 |
| 590                | $\Delta J=1$ (1 <sup>st</sup> max.) | 0.155    | -0.0150 | -0.0450  |
| 598                | $\Delta J=1$ (2 <sup>nd</sup> max.) | 0.0326   | 0.183   | 0.0425   |
| 616                | $\Delta J=2$                        | -0.159   | -0.0204 | -0.0101  |
| 689                | $\Delta J=4$ (1 <sup>st</sup> max.) | -0.00162 | 0.160   | 0.0481   |
| 698                | $\Delta J=4$ (2 <sup>nd</sup> max.) | 0.119    | 0.0211  | 0.0349   |

## 5. References

- 1 P. Kuzmič, *Anal. Biochem.*, 1996, **237**, 260–273.
- 2 A. Dadabhoy, S. Faulkner and P. G. Sammes, *J. Chem. Soc., Perkin Trans. 2*, 2002, 348–357.

## 6. Full titration data

EuNmnbDO3A\_AMP\_LH230\_S1,,,,,,,,,,,,,  
,0,0.11832,0.29491,0.58691,1.16231,2.00456,3.35533,5.38887,7.73186,10.6894,14.37032,18.11259  
570,5000,4000,6000,3000,5000,5000,4000,6000,9000,7000,4000,8000  
571,9000,7000,7000,4000,3000,4000,3000,4000,5000,5000,6000,7000  
572,3000,6000,4000,6000,7000,6000,3000,6000,4000,9000,7000,4000  
573,4000,6000,12000,4000,4000,8000,4000,9000,3000,9000,5000,5000  
574,7000,4000,13000,4000,4000,6000,3000,6000,7000,5000,3000,6000  
575,4000,5000,3000,5000,8000,1000,3000,5000,3000,4000,4000,6000  
576,13000,11000,12000,8000,9000,4000,11000,13000,9000,9000,9000,10000  
577,34000,41000,29000,32000,26000,20000,29000,29000,20000,33000,21000,23000  
578,103000,80000,89000,76000,80000,81000,76000,59000,61000,66000,56000,61000  
579,149000,139000,142000,143000,117000,96000,86000,83000,64000,83000,67000,61000  
580,172000,138000,123000,140000,101000,84000,96000,95000,77000,71000,76000,81000  
581,100000,113000,96000,87000,63000,87000,77000,67000,69000,67000,69000,57000  
582,56000,50000,49000,54000,29000,51000,29000,34000,38000,40000,46000,28000  
583,27000,27000,24000,32000,26000,34000,32000,17000,20000,18000,27000,14000  
584,17000,17000,18000,21000,22000,17000,19000,25000,26000,37000,23000,42000  
585,22000,27000,38000,40000,38000,43000,45000,66000,57000,64000,64000,67000  
586,37000,47000,71000,79000,89000,107000,97000,120000,113000,129000,117000,108000  
587,113000,110000,120000,121000,164000,132000,165000,172000,175000,196000,192000,172000  
588,233000,181000,241000,194000,193000,217000,209000,249000,238000,258000,200000,214000  
589,268000,275000,272000,291000,251000,243000,287000,255000,228000,241000,267000,247000  
590,353000,325000,326000,313000,285000,249000,233000,218000,251000,246000,236000,195000  
591,327000,327000,335000,311000,318000,256000,275000,249000,237000,226000,223000,216000  
592,311000,284000,307000,268000,262000,263000,233000,249000,219000,232000,249000,262000  
593,227000,210000,224000,195000,217000,219000,222000,262000,242000,275000,244000,274000  
594,181000,152000,194000,190000,190000,216000,245000,268000,271000,261000,280000,284000  
595,131000,162000,151000,171000,177000,190000,247000,251000,281000,291000,311000,317000  
596,176000,163000,181000,208000,184000,201000,225000,236000,243000,303000,320000,276000  
597,180000,175000,203000,165000,186000,184000,234000,215000,222000,253000,230000,250000  
598,207000,160000,168000,176000,159000,155000,157000,179000,179000,167000,171000,195000  
599,140000,123000,136000,141000,146000,123000,120000,107000,99000,141000,139000,105000  
600,96000,91000,109000,87000,72000,69000,88000,74000,77000,79000,71000,61000  
601,49000,43000,72000,55000,47000,39000,56000,44000,49000,37000,54000,41000  
602,41000,23000,40000,40000,37000,32000,21000,38000,39000,23000,28000,30000  
603,21000,35000,29000,34000,31000,31000,33000,20000,29000,20000,25000,25000  
604,20000,28000,30000,32000,34000,28000,39000,32000,27000,40000,30000,24000  
605,29000,21000,26000,29000,25000,30000,38000,38000,29000,26000,25000,17000  
606,34000,29000,26000,36000,33000,25000,29000,36000,33000,21000,29000,26000  
607,44000,36000,40000,39000,34000,31000,39000,30000,36000,38000,41000,37000  
608,44000,44000,46000,48000,50000,47000,42000,44000,55000,35000,38000,36000  
609,58000,56000,59000,61000,51000,44000,51000,60000,56000,51000,60000,53000  
610,100000,93000,104000,98000,103000,96000,102000,72000,72000,66000,70000,81000  
611,209000,193000,205000,175000,178000,168000,157000,104000,127000,129000,114000,112000  
612,409000,376000,358000,317000,332000,249000,257000,235000,244000,219000,201000,201000  
613,513000,533000,563000,526000,448000,423000,396000,413000,399000,394000,432000,382000  
614,716000,587000,687000,613000,641000,672000,620000,660000,627000,686000,682000,648000  
615,766000,686000,805000,767000,751000,806000,744000,809000,866000,847000,859000,855000  
616,784000,750000,842000,810000,839000,909000,908000,987000,958000,957000,938000,932000  
617,792000,732000,839000,810000,852000,855000,812000,836000,828000,913000,872000,899000  
618,731000,627000,687000,704000,688000,692000,674000,681000,621000,644000,686000,690000  
619,529000,476000,555000,497000,492000,436000,424000,452000,445000,459000,471000,426000  
620,408000,328000,376000,351000,343000,335000,316000,299000,276000,300000,298000,268000  
621,289000,242000,283000,232000,222000,228000,226000,205000,212000,215000,191000,188000  
622,225000,202000,232000,209000,180000,161000,166000,162000,165000,144000,146000,149000  
623,219000,173000,195000,198000,163000,158000,164000,152000,147000,142000,158000,133000  
624,181000,151000,145000,155000,128000,127000,121000,127000,124000,107000,160000,142000  
625,115000,112000,131000,135000,132000,107000,105000,112000,131000,123000,122000,127000  
626,115000,73000,100000,91000,83000,100000,92000,83000,88000,78000,91000,90000  
627,58000,59000,63000,63000,42000,49000,65000,53000,61000,54000,63000,64000  
628,45000,25000,40000,38000,51000,61000,56000,39000,46000,50000,53000,48000  
629,35000,35000,33000,43000,37000,30000,36000,37000,26000,45000,38000,28000  
630,36000,33000,32000,31000,22000,31000,30000,26000,32000,34000,27000,40000  
631,24000,21000,24000,26000,18000,31000,37000,24000,32000,24000,32000,32000

632,22000,15000,30000,13000,26000,25000,22000,24000,26000,32000,22000,22000  
633,15000,21000,19000,24000,20000,19000,18000,32000,21000,22000,20000,18000  
634,18000,14000,19000,15000,13000,19000,19000,19000,14000,15000,20000,21000  
635,15000,11000,10000,19000,16000,15000,17000,11000,20000,14000,12000,16000  
636,12000,15000,18000,11000,15000,18000,10000,15000,11000,15000,9000,15000  
637,19000,7000,10000,12000,7000,12000,13000,9000,10000,10000,18000,18000  
638,10000,10000,15000,3000,11000,9000,8000,13000,2000,13000,9000,9000  
639,14000,13000,5000,8000,10000,16000,7000,12000,6000,23000,8000,10000  
640,8000,11000,7000,7000,13000,7000,8000,11000,5000,8000,9000,17000  
641,11000,7000,12000,11000,5000,4000,6000,2000,7000,12000,9000,9000  
642,14000,8000,11000,12000,6000,5000,10000,11000,6000,12000,11000,9000  
643,8000,9000,14000,7000,5000,8000,5000,6000,4000,9000,6000,9000  
644,7000,6000,10000,7000,7000,2000,9000,16000,8000,9000,9000,10000  
645,10000,9000,7000,9000,10000,7000,14000,13000,9000,6000,12000,6000  
646,10000,6000,8000,9000,6000,9000,4000,11000,11000,11000,12000,10000  
647,11000,16000,9000,7000,10000,10000,19000,14000,15000,8000,9000,8000  
648,15000,11000,7000,13000,13000,17000,18000,21000,10000,11000,10000,14000  
649,18000,13000,24000,20000,14000,20000,22000,28000,13000,20000,20000,19000  
650,29000,20000,19000,19000,27000,17000,35000,27000,20000,24000,33000,25000  
651,22000,24000,24000,21000,21000,23000,38000,31000,31000,30000,27000,33000  
652,21000,16000,19000,28000,33000,31000,43000,21000,37000,38000,33000,43000  
653,16000,25000,19000,32000,24000,19000,39000,33000,41000,27000,33000,30000  
654,24000,18000,29000,23000,17000,25000,20000,23000,36000,33000,39000,38000  
655,17000,24000,20000,19000,26000,28000,20000,26000,30000,26000,33000,27000  
656,21000,10000,19000,29000,21000,12000,8000,26000,16000,17000,23000,12000  
657,19000,17000,18000,12000,16000,22000,14000,12000,25000,16000,10000,11000  
658,5000,13000,13000,13000,12000,8000,17000,12000,14000,12000,18000,13000  
659,5000,7000,12000,7000,9000,8000,9000,8000,13000,5000,9000,12000  
660,7000,4000,7000,6000,4000,10000,9000,16000,10000,9000,5000,10000  
661,5000,6000,6000,10000,7000,6000,5000,6000,9000,3000,8000,8000  
662,2000,4000,2000,7000,10000,14000,4000,9000,5000,18000,12000,4000  
663,9000,1000,8000,7000,7000,10000,5000,8000,4000,8000,11000,7000  
664,6000,6000,7000,3000,5000,7000,8000,6000,11000,6000,8000,6000  
665,10000,1000,11000,8000,7000,10000,6000,11000,6000,6000,7000,10000  
666,10000,4000,11000,8000,7000,7000,6000,9000,13000,5000,4000,10000  
667,4000,7000,5000,9000,4000,5000,10000,4000,2000,6000,10000,3000  
668,8000,4000,8000,2000,6000,9000,5000,5000,11000,9000,4000,10000  
669,6000,5000,8000,6000,6000,4000,8000,8000,9000,6000,5000,7000  
670,10000,14000,8000,7000,9000,5000,8000,8000,8000,7000,7000,8000  
671,4000,3000,5000,6000,5000,10000,11000,5000,5000,10000,10000,4000  
672,8000,5000,13000,10000,6000,9000,6000,7000,7000,12000,8000,2000  
673,11000,7000,7000,8000,4000,7000,13000,5000,13000,10000,5000,10000  
674,6000,6000,3000,4000,7000,8000,9000,8000,13000,10000,6000,12000  
675,5000,8000,10000,8000,8000,14000,6000,8000,13000,5000,5000,4000  
676,4000,10000,7000,7000,11000,9000,7000,8000,8000,9000,8000,10000  
677,7000,10000,12000,11000,8000,7000,9000,8000,7000,15000,11000,3000  
678,8000,7000,10000,12000,8000,9000,9000,5000,6000,10000,7000,5000  
679,8000,9000,12000,13000,10000,9000,10000,14000,6000,5000,12000,5000  
680,6000,16000,11000,11000,17000,7000,8000,18000,7000,14000,11000,12000  
681,14000,10000,23000,11000,15000,13000,19000,16000,6000,6000,7000,9000  
682,27000,26000,28000,10000,17000,17000,13000,11000,14000,14000,12000,11000  
683,28000,29000,23000,19000,26000,28000,18000,14000,18000,21000,12000,14000  
684,41000,41000,41000,34000,18000,27000,31000,31000,28000,26000,22000,16000  
685,55000,49000,57000,42000,44000,36000,38000,30000,24000,36000,27000,26000  
686,58000,64000,60000,58000,59000,59000,43000,45000,51000,45000,31000,37000  
687,105000,79000,80000,86000,74000,53000,69000,49000,71000,58000,55000,56000  
688,101000,92000,96000,95000,85000,75000,75000,84000,95000,81000,76000,92000  
689,115000,80000,91000,93000,104000,99000,116000,112000,99000,101000,111000,101000  
690,82000,70000,100000,91000,91000,89000,103000,102000,108000,130000,130000,143000  
691,69000,67000,82000,77000,78000,114000,88000,96000,99000,108000,118000,130000  
692,55000,69000,63000,65000,71000,80000,82000,95000,97000,97000,85000,97000  
693,66000,54000,70000,74000,64000,63000,60000,69000,81000,81000,71000,75000  
694,64000,69000,74000,78000,65000,66000,69000,76000,74000,61000,67000,57000  
695,87000,91000,83000,84000,73000,94000,83000,70000,80000,72000,64000,67000  
696,104000,90000,106000,90000,81000,76000,78000,72000,73000,81000,54000,94000  
697,121000,103000,93000,89000,112000,91000,102000,98000,88000,89000,75000,85000

698,114000,95000,120000,107000,130000,97000,72000,94000,97000,99000,87000,100000  
699,95000,106000,101000,101000,101000,103000,86000,108000,116000,89000,94000,86000  
700,133000,121000,111000,116000,128000,101000,122000,115000,113000,101000,103000,112000  
701,89000,94000,128000,98000,78000,115000,101000,106000,120000,107000,126000,142000  
702,79000,66000,83000,84000,91000,81000,106000,95000,109000,114000,98000,116000  
703,59000,51000,61000,54000,64000,68000,75000,94000,89000,79000,84000,85000  
704,32000,35000,33000,32000,38000,46000,52000,59000,55000,67000,62000,58000  
705,26000,29000,28000,26000,35000,21000,27000,31000,35000,35000,37000,22000  
706,13000,15000,11000,17000,18000,14000,21000,14000,15000,15000,17000,17000  
707,9000,6000,11000,15000,12000,12000,15000,11000,13000,21000,18000,12000  
708,5000,8000,8000,13000,7000,12000,5000,8000,7000,9000,11000,14000  
709,5000,6000,6000,8000,5000,10000,8000,9000,10000,6000,17000,14000  
710,6000,11000,11000,9000,10000,6000,8000,5000,8000,5000,7000,6000  
711,3000,4000,3000,7000,3000,7000,3000,6000,7000,9000,9000,10000  
712,5000,1000,3000,6000,3000,2000,9000,3000,4000,6000,2000,7000  
713,5000,6000,8000,4000,2000,11000,7000,6000,4000,8000,5000,7000  
714,2000,2000,4000,4000,2000,7000,4000,2000,6000,6000,4000,6000  
715,6000,2000,5000,3000,3000,12000,4000,9000,1000,3000,3000,7000  
716,4000,4000,7000,2000,8000,1000,2000,7000,7000,7000,7000,5000  
717,2000,1000,4000,3000,8000,5000,2000,10000,0,5000,9000,5000  
718,4000,1000,6000,1000,4000,1000,4000,5000,11000,1000,5000,4000  
719,4000,1000,1000,3000,6000,5000,5000,3000,2000,5000,2000,3000  
720,4000,9000,1000,3000,4000,9000,2000,2000,2000,5000,8000,5000

EuNmnbDO3A\_AD\_P\_LH231\_S1,,,,,,,,,,,,,

,0,0.11938,0.29756,0.59218,1.17274,2.02256,3.38547,5.43726,7.80129,10.78539,14.49937,18.56169  
570,3000,5000,1000,1000,4000,6000,5000,4000,2000,1000,3000,12000  
571,6000,6000,2000,6000,8000,1000,7000,3000,4000,7000,3000,7000  
572,4000,8000,5000,7000,9000,4000,6000,7000,4000,7000,5000,6000  
573,4000,0,6000,7000,9000,6000,12000,7000,7000,4000,6000,7000  
574,8000,8000,4000,5000,4000,7000,3000,3000,4000,4000,10000,10000  
575,6000,5000,7000,6000,5000,6000,6000,2000,6000,11000,7000,12000  
576,15000,17000,10000,13000,11000,6000,5000,7000,8000,11000,15000,7000  
577,44000,38000,53000,39000,38000,35000,39000,31000,47000,34000,30000,29000  
578,89000,98000,71000,104000,68000,97000,97000,87000,63000,64000,100000,76000  
579,128000,159000,110000,153000,126000,133000,135000,135000,137000,135000,115000,100000  
580,128000,137000,128000,138000,132000,125000,154000,123000,123000,144000,115000,114000  
581,102000,96000,101000,103000,90000,67000,102000,97000,90000,103000,98000,92000  
582,47000,49000,49000,75000,38000,37000,58000,46000,44000,46000,64000,47000  
583,23000,28000,21000,27000,23000,20000,24000,17000,12000,24000,24000,29000  
584,21000,20000,24000,25000,15000,27000,22000,20000,20000,20000,18000,29000  
585,24000,24000,36000,25000,27000,17000,36000,35000,37000,43000,40000,45000  
586,59000,61000,47000,57000,46000,52000,86000,66000,64000,74000,66000,87000  
587,105000,102000,120000,121000,104000,95000,127000,135000,127000,135000,110000,130000  
588,196000,207000,197000,200000,189000,167000,200000,188000,207000,187000,233000,202000  
589,261000,314000,259000,293000,224000,248000,263000,291000,260000,242000,269000,262000  
590,308000,353000,307000,330000,338000,305000,323000,342000,326000,263000,323000,273000  
591,303000,387000,324000,330000,316000,294000,303000,310000,332000,303000,325000,301000  
592,256000,287000,269000,309000,229000,294000,309000,319000,345000,270000,306000,287000  
593,200000,208000,196000,195000,225000,255000,276000,278000,293000,297000,357000,328000  
594,165000,155000,151000,173000,195000,205000,249000,280000,308000,300000,328000,326000  
595,123000,149000,114000,163000,170000,197000,194000,255000,277000,280000,297000,317000  
596,147000,157000,127000,152000,150000,180000,218000,242000,207000,249000,252000,254000  
597,170000,180000,163000,157000,185000,177000,201000,209000,206000,189000,205000,204000  
598,187000,162000,143000,170000,164000,151000,172000,160000,166000,151000,160000,144000  
599,108000,170000,106000,140000,132000,111000,119000,119000,113000,102000,110000,87000  
600,81000,89000,91000,88000,103000,98000,77000,88000,91000,66000,55000,65000  
601,65000,73000,48000,66000,58000,58000,55000,60000,61000,31000,47000,39000  
602,39000,41000,33000,31000,30000,31000,30000,31000,41000,32000,40000,17000  
603,34000,40000,33000,30000,35000,21000,27000,30000,27000,33000,25000,27000  
604,30000,47000,30000,37000,31000,28000,27000,36000,32000,27000,27000,25000  
605,24000,41000,23000,30000,32000,19000,26000,28000,24000,30000,32000,22000  
606,33000,36000,30000,30000,26000,25000,39000,43000,33000,32000,31000,31000  
607,31000,50000,35000,34000,29000,33000,46000,40000,35000,35000,38000,33000  
608,41000,49000,52000,44000,36000,43000,55000,36000,58000,55000,48000,48000  
609,62000,54000,59000,54000,68000,66000,59000,43000,77000,66000,54000,51000  
610,92000,104000,101000,100000,91000,88000,107000,115000,92000,87000,104000,74000

611,197000,223000,208000,245000,168000,168000,204000,177000,179000,164000,151000,175000  
612,370000,381000,372000,363000,334000,336000,387000,321000,272000,307000,317000,286000  
613,514000,550000,448000,530000,467000,486000,592000,525000,536000,497000,530000,504000  
614,615000,701000,579000,651000,652000,649000,747000,715000,786000,688000,784000,716000  
615,669000,722000,715000,765000,750000,779000,890000,882000,982000,858000,904000,939000  
616,768000,794000,700000,825000,806000,785000,926000,1023000,977000,941000,1037000,977000  
617,676000,809000,680000,798000,794000,778000,860000,893000,884000,772000,967000,936000  
618,652000,706000,639000,706000,666000,624000,749000,742000,717000,681000,782000,783000  
619,482000,532000,499000,535000,528000,500000,498000,586000,515000,478000,536000,526000  
620,351000,369000,351000,387000,348000,341000,366000,369000,362000,364000,354000,357000  
621,237000,284000,258000,245000,235000,247000,264000,285000,257000,252000,277000,242000  
622,172000,233000,210000,219000,206000,200000,216000,198000,190000,197000,186000,194000  
623,172000,186000,162000,199000,164000,174000,192000,169000,163000,167000,188000,141000  
624,147000,177000,148000,160000,182000,141000,154000,126000,155000,118000,132000,151000  
625,105000,128000,108000,129000,115000,118000,135000,112000,114000,114000,132000,109000  
626,82000,102000,80000,81000,84000,67000,92000,85000,82000,82000,87000,78000  
627,51000,69000,60000,47000,49000,65000,59000,59000,47000,52000,51000,46000  
628,38000,52000,40000,56000,37000,48000,45000,55000,36000,43000,35000,53000  
629,36000,44000,37000,36000,31000,37000,39000,39000,38000,33000,39000,34000  
630,24000,31000,31000,47000,25000,41000,48000,35000,35000,31000,28000,35000  
631,23000,26000,33000,21000,28000,29000,27000,30000,28000,26000,24000,26000  
632,18000,25000,22000,22000,20000,18000,35000,19000,31000,18000,29000,23000  
633,19000,26000,33000,21000,16000,15000,21000,27000,17000,18000,25000,19000  
634,17000,18000,10000,18000,16000,18000,15000,16000,19000,16000,14000,14000  
635,11000,20000,17000,11000,16000,15000,26000,18000,15000,17000,18000,18000  
636,8000,16000,10000,15000,14000,10000,8000,22000,15000,8000,14000,8000  
637,11000,16000,10000,10000,13000,12000,13000,9000,9000,12000,15000,12000  
638,5000,8000,11000,10000,6000,9000,12000,9000,6000,13000,9000,11000  
639,11000,10000,17000,3000,14000,16000,13000,9000,12000,14000,9000,11000  
640,11000,7000,9000,8000,16000,10000,9000,17000,9000,14000,10000,14000  
641,11000,7000,11000,8000,10000,14000,9000,4000,14000,12000,13000,7000  
642,9000,9000,7000,8000,7000,3000,11000,12000,8000,4000,12000,8000  
643,7000,6000,3000,6000,9000,9000,9000,8000,7000,5000,3000,5000  
644,12000,8000,8000,6000,14000,4000,8000,12000,16000,8000,3000,13000  
645,5000,8000,5000,8000,8000,5000,5000,6000,8000,6000,9000,12000  
646,12000,11000,16000,12000,8000,10000,13000,4000,9000,6000,7000,13000  
647,13000,12000,16000,13000,19000,8000,11000,9000,9000,10000,12000,13000  
648,15000,21000,12000,25000,15000,5000,16000,12000,12000,8000,17000,14000  
649,12000,30000,22000,20000,21000,34000,30000,16000,11000,15000,24000,25000  
650,17000,28000,18000,24000,19000,35000,23000,27000,28000,17000,30000,27000  
651,22000,26000,20000,24000,15000,23000,19000,33000,26000,23000,24000,27000  
652,25000,34000,20000,24000,21000,30000,20000,27000,28000,28000,29000,33000  
653,27000,25000,30000,28000,25000,23000,35000,31000,35000,29000,28000,38000  
654,22000,15000,15000,18000,16000,21000,23000,13000,27000,25000,22000,13000  
655,17000,33000,17000,27000,19000,15000,22000,21000,15000,14000,22000,23000  
656,16000,18000,20000,19000,21000,20000,22000,13000,17000,22000,15000,24000  
657,15000,16000,14000,19000,16000,15000,26000,18000,15000,7000,11000,13000  
658,9000,10000,9000,15000,13000,12000,12000,13000,9000,8000,11000,12000  
659,15000,18000,14000,14000,13000,15000,10000,10000,11000,13000,8000,11000  
660,4000,9000,10000,8000,9000,5000,9000,9000,9000,11000,7000,11000  
661,10000,8000,5000,3000,6000,3000,5000,16000,14000,10000,10000,8000  
662,2000,12000,9000,12000,4000,6000,9000,11000,10000,13000,7000,10000  
663,6000,8000,4000,3000,2000,6000,7000,6000,9000,12000,4000,11000  
664,9000,7000,9000,8000,7000,5000,3000,9000,4000,4000,5000,6000  
665,5000,4000,10000,8000,9000,7000,12000,7000,6000,7000,9000,10000  
666,3000,4000,2000,1000,6000,4000,5000,7000,8000,8000,3000,8000  
667,4000,12000,7000,11000,6000,12000,8000,8000,9000,8000,6000,8000  
668,6000,10000,2000,9000,5000,8000,9000,6000,7000,10000,11000,7000  
669,6000,8000,6000,2000,6000,6000,6000,5000,11000,5000,10000,3000  
670,6000,2000,8000,11000,7000,9000,7000,4000,8000,7000,6000,3000  
671,11000,4000,5000,9000,12000,6000,9000,11000,8000,7000,5000,11000  
672,8000,7000,9000,9000,14000,5000,10000,9000,8000,6000,2000,16000  
673,4000,8000,8000,11000,7000,12000,7000,9000,9000,8000,10000,16000  
674,10000,8000,9000,9000,8000,8000,12000,10000,6000,6000,10000,6000  
675,4000,9000,9000,5000,8000,9000,10000,11000,13000,6000,5000,13000  
676,5000,8000,6000,11000,6000,9000,17000,9000,9000,7000,11000,8000

677,8000,9000,16000,6000,8000,12000,4000,7000,14000,5000,13000,7000  
678,10000,9000,10000,12000,10000,10000,12000,13000,9000,9000,12000,8000  
679,12000,14000,14000,17000,11000,12000,8000,8000,8000,6000,12000,10000  
680,9000,12000,11000,15000,6000,7000,11000,14000,7000,10000,10000,4000  
681,15000,12000,13000,11000,7000,12000,13000,11000,12000,13000,13000,12000  
682,21000,17000,14000,29000,27000,15000,11000,14000,17000,14000,8000,11000  
683,30000,27000,35000,27000,30000,25000,31000,22000,23000,19000,17000,17000  
684,44000,44000,51000,39000,40000,27000,37000,33000,30000,22000,20000,25000  
685,48000,55000,48000,62000,44000,44000,43000,43000,39000,27000,32000,28000  
686,62000,74000,55000,70000,61000,46000,45000,44000,46000,42000,42000,34000  
687,79000,95000,61000,74000,75000,83000,86000,71000,74000,60000,50000,66000  
688,92000,124000,87000,82000,83000,92000,95000,101000,84000,81000,73000,66000  
689,87000,101000,101000,102000,74000,85000,87000,90000,97000,75000,98000,99000  
690,78000,78000,89000,90000,81000,77000,107000,128000,114000,84000,142000,105000  
691,69000,78000,57000,74000,97000,83000,93000,115000,117000,122000,129000,108000  
692,64000,66000,53000,67000,59000,69000,105000,95000,101000,118000,101000,116000  
693,60000,53000,55000,64000,68000,69000,91000,87000,91000,91000,115000,101000  
694,65000,81000,82000,78000,63000,75000,79000,84000,78000,90000,89000,94000  
695,78000,97000,91000,90000,86000,86000,99000,77000,78000,92000,101000,78000  
696,84000,82000,92000,94000,93000,82000,94000,86000,84000,71000,105000,70000  
697,90000,85000,81000,97000,110000,96000,112000,99000,89000,86000,82000,76000  
698,105000,105000,112000,122000,98000,104000,112000,124000,117000,107000,102000,96000  
699,100000,131000,111000,126000,110000,114000,140000,122000,108000,94000,119000,88000  
700,109000,116000,87000,144000,102000,125000,107000,128000,136000,107000,160000,159000  
701,74000,103000,91000,96000,99000,110000,105000,110000,121000,119000,123000,112000  
702,78000,86000,72000,82000,79000,74000,105000,92000,105000,105000,100000,104000  
703,40000,68000,55000,65000,46000,70000,65000,69000,72000,72000,101000,84000  
704,31000,33000,41000,31000,32000,44000,38000,56000,48000,63000,41000,56000  
705,17000,24000,16000,20000,18000,29000,25000,38000,25000,27000,19000,40000  
706,17000,15000,7000,10000,10000,21000,17000,23000,19000,17000,24000,14000  
707,9000,9000,14000,14000,16000,22000,13000,19000,15000,14000,15000,9000  
708,13000,16000,11000,7000,13000,11000,11000,14000,18000,11000,12000,16000  
709,10000,8000,8000,14000,18000,5000,8000,13000,9000,10000,12000,15000  
710,10000,12000,3000,9000,10000,7000,8000,8000,7000,7000,5000,8000  
711,7000,1000,6000,3000,11000,4000,7000,10000,5000,3000,5000,9000  
712,10000,4000,6000,9000,4000,6000,7000,5000,7000,6000,8000,6000  
713,4000,5000,8000,7000,8000,5000,6000,12000,7000,8000,8000,10000  
714,3000,3000,5000,8000,8000,5000,9000,9000,10000,3000,8000,8000  
715,8000,8000,6000,5000,5000,7000,7000,9000,6000,4000,4000,2000  
716,5000,5000,3000,7000,4000,7000,1000,5000,8000,10000,4000,7000  
717,6000,3000,3000,12000,7000,4000,4000,5000,2000,4000,1000,4000  
718,7000,3000,7000,7000,7000,4000,7000,5000,7000,6000,9000,3000  
719,3000,6000,3000,5000,10000,4000,5000,9000,2000,9000,0,2000  
720,5000,7000,4000,2000,7000,9000,3000,6000,7000,4000,4000,4000

EuNmbDO3A\_ATP\_LH232\_S1,,,,,,,,,,,,,  
.0,0.12568,0.31326,0.62342,1.23462,2.12928,3.5641,5.72416,8.21293,11.35448,15.26443,19.5411  
570,5000,5000,2000,8000,2000,5000,1000,10000,7000,8000,4000,5000  
571,3000,6000,7000,4000,2000,7000,8000,5000,1000,4000,3000,3000  
572,8000,7000,4000,5000,6000,7000,6000,4000,5000,9000,9000,7000  
573,8000,7000,1000,12000,8000,7000,3000,4000,2000,15000,7000,5000  
574,8000,5000,4000,5000,6000,14000,7000,3000,9000,5000,9000,3000  
575,11000,9000,9000,6000,13000,5000,7000,12000,8000,5000,9000,13000  
576,10000,8000,15000,12000,17000,7000,14000,12000,10000,15000,14000,15000  
577,42000,51000,35000,45000,47000,44000,32000,48000,30000,33000,37000,39000  
578,99000,104000,77000,103000,116000,126000,90000,81000,102000,73000,79000,104000  
579,135000,132000,129000,151000,129000,142000,149000,140000,158000,151000,137000,122000  
580,119000,140000,147000,128000,144000,130000,150000,138000,125000,146000,120000,133000  
581,79000,108000,81000,109000,90000,107000,92000,108000,105000,111000,94000,101000  
582,41000,53000,39000,60000,54000,58000,63000,63000,59000,68000,57000,59000  
583,23000,22000,20000,21000,29000,30000,20000,26000,21000,32000,19000,15000  
584,17000,27000,20000,16000,27000,25000,26000,27000,19000,18000,23000,21000  
585,33000,24000,27000,26000,24000,27000,27000,27000,36000,35000,31000,43000,32000  
586,63000,52000,62000,49000,62000,62000,53000,65000,62000,75000,58000,57000  
587,102000,124000,101000,111000,121000,112000,125000,136000,144000,121000,126000,121000  
588,167000,192000,168000,210000,208000,210000,194000,192000,198000,222000,185000,200000  
589,283000,293000,289000,269000,276000,296000,286000,276000,246000,276000,260000,293000

590,325000,310000,302000,319000,322000,352000,290000,332000,313000,328000,274000,293000  
591,313000,311000,305000,337000,321000,369000,321000,315000,372000,323000,323000,322000  
592,256000,254000,295000,330000,285000,279000,339000,306000,292000,320000,299000,336000  
593,196000,177000,211000,215000,210000,232000,261000,260000,253000,262000,271000,297000  
594,155000,158000,182000,185000,193000,204000,198000,230000,242000,249000,229000,278000  
595,143000,146000,155000,138000,159000,170000,196000,200000,207000,262000,232000,229000  
596,138000,149000,144000,152000,157000,176000,228000,221000,207000,233000,204000,222000  
597,174000,178000,176000,158000,171000,167000,173000,195000,170000,202000,199000,184000  
598,128000,173000,192000,183000,190000,198000,153000,164000,150000,184000,157000,159000  
599,134000,139000,137000,105000,130000,138000,133000,120000,114000,116000,112000,101000  
600,91000,83000,86000,109000,94000,99000,96000,108000,94000,86000,71000,84000  
601,68000,65000,59000,69000,52000,48000,60000,63000,54000,59000,46000,48000  
602,33000,43000,28000,43000,33000,46000,31000,20000,26000,40000,36000,30000  
603,41000,29000,36000,26000,23000,41000,29000,25000,23000,23000,24000,33000  
604,29000,31000,28000,40000,27000,27000,25000,28000,28000,26000,32000,29000  
605,30000,26000,29000,27000,33000,28000,31000,28000,28000,25000,25000,37000  
606,18000,30000,30000,31000,30000,40000,32000,33000,31000,39000,43000,32000  
607,38000,54000,42000,40000,39000,37000,36000,34000,38000,33000,37000,33000  
608,56000,40000,33000,42000,52000,37000,56000,54000,38000,47000,45000,52000  
609,55000,59000,71000,65000,55000,64000,71000,74000,62000,70000,70000,61000  
610,95000,99000,98000,132000,109000,99000,106000,86000,98000,99000,84000,94000  
611,210000,205000,213000,225000,205000,178000,189000,176000,182000,193000,154000,156000  
612,342000,379000,358000,389000,372000,338000,346000,338000,351000,338000,305000,314000  
613,519000,505000,516000,527000,534000,521000,540000,527000,496000,604000,478000,490000  
614,608000,624000,596000,717000,657000,750000,671000,718000,689000,718000,714000,716000  
615,656000,694000,737000,732000,727000,766000,804000,824000,790000,900000,840000,858000  
616,650000,722000,812000,782000,774000,781000,791000,874000,839000,992000,869000,885000  
617,694000,724000,768000,786000,703000,768000,789000,876000,818000,905000,861000,881000  
618,593000,653000,649000,656000,716000,697000,697000,744000,671000,752000,652000,679000  
619,503000,500000,484000,540000,502000,533000,517000,526000,474000,540000,468000,493000  
620,356000,355000,341000,367000,347000,356000,341000,367000,330000,369000,327000,310000  
621,255000,267000,249000,284000,248000,265000,269000,239000,213000,221000,243000,227000  
622,203000,189000,212000,208000,208000,192000,190000,217000,190000,193000,192000,187000  
623,176000,163000,176000,175000,180000,172000,156000,184000,149000,180000,153000,134000  
624,134000,131000,154000,179000,156000,167000,131000,136000,123000,156000,134000,123000  
625,98000,115000,119000,108000,120000,120000,114000,97000,90000,124000,87000,106000  
626,82000,97000,83000,77000,81000,75000,72000,79000,70000,84000,69000,73000  
627,65000,60000,64000,68000,53000,78000,60000,56000,56000,53000,47000,69000  
628,45000,44000,42000,59000,42000,39000,45000,49000,57000,52000,46000,43000  
629,39000,37000,32000,39000,32000,34000,27000,33000,42000,43000,36000,44000  
630,17000,28000,27000,32000,33000,37000,35000,36000,29000,32000,21000,30000  
631,33000,29000,31000,30000,35000,17000,31000,31000,34000,23000,26000,26000  
632,18000,28000,32000,24000,19000,35000,18000,22000,22000,31000,22000,20000  
633,25000,14000,22000,19000,16000,19000,25000,15000,26000,27000,21000,16000  
634,16000,17000,13000,16000,15000,21000,14000,12000,16000,16000,16000,19000  
635,13000,14000,15000,22000,19000,20000,14000,18000,7000,14000,15000,20000  
636,14000,15000,19000,9000,7000,15000,9000,20000,11000,15000,20000,9000  
637,13000,15000,17000,9000,15000,11000,13000,12000,10000,12000,18000,8000  
638,8000,14000,7000,11000,7000,7000,9000,6000,13000,10000,10000,9000  
639,8000,9000,7000,10000,10000,9000,7000,13000,10000,12000,12000,6000  
640,10000,13000,9000,11000,8000,9000,8000,8000,7000,5000,10000,14000  
641,5000,15000,18000,14000,8000,8000,7000,9000,8000,11000,12000,14000  
642,5000,10000,7000,12000,3000,9000,8000,11000,4000,12000,9000,15000  
643,15000,9000,8000,10000,8000,13000,7000,2000,7000,15000,7000,10000  
644,7000,8000,9000,10000,7000,8000,10000,10000,8000,10000,8000,7000  
645,9000,9000,13000,9000,8000,12000,13000,7000,13000,9000,13000,10000  
646,13000,12000,13000,7000,12000,8000,10000,7000,8000,4000,11000,14000  
647,12000,21000,18000,5000,11000,8000,4000,10000,17000,16000,12000,12000  
648,11000,16000,24000,19000,14000,20000,14000,17000,19000,14000,15000,13000  
649,20000,24000,19000,26000,30000,24000,24000,22000,13000,31000,22000,13000  
650,21000,14000,28000,23000,21000,14000,32000,19000,23000,25000,22000,22000  
651,20000,19000,21000,21000,34000,21000,23000,26000,26000,33000,28000,22000  
652,20000,25000,17000,30000,23000,24000,21000,28000,20000,32000,16000,27000  
653,24000,18000,27000,18000,16000,25000,27000,19000,24000,22000,26000,27000  
654,34000,26000,21000,19000,20000,24000,26000,22000,28000,37000,28000,17000  
655,16000,23000,21000,21000,25000,21000,21000,24000,33000,27000,24000,10000



656,18000,18000,22000,19000,15000,15000,24000,19000,17000,14000,15000,16000  
657,8000,22000,17000,17000,24000,13000,12000,14000,8000,17000,14000,14000  
658,19000,18000,13000,15000,12000,7000,11000,20000,14000,11000,5000,12000  
659,10000,6000,9000,6000,5000,9000,9000,11000,14000,15000,8000,13000  
660,7000,10000,5000,12000,8000,10000,10000,13000,9000,10000,11000,9000  
661,10000,6000,9000,11000,8000,3000,6000,4000,10000,12000,9000,13000  
662,12000,4000,5000,6000,9000,5000,6000,9000,7000,12000,8000,7000  
663,4000,8000,6000,8000,5000,7000,9000,10000,15000,11000,14000,5000  
664,9000,5000,5000,9000,8000,13000,7000,8000,8000,10000,11000,13000  
665,5000,6000,6000,5000,5000,6000,3000,6000,7000,13000,7000,5000  
666,7000,10000,6000,10000,6000,14000,5000,5000,9000,7000,13000,15000  
667,7000,11000,6000,8000,8000,5000,4000,5000,4000,7000,6000,7000  
668,3000,11000,6000,7000,4000,10000,7000,9000,3000,10000,7000,8000  
669,7000,4000,3000,5000,18000,8000,13000,3000,5000,11000,6000,4000  
670,6000,7000,5000,7000,7000,13000,9000,4000,8000,6000,7000,6000  
671,6000,13000,4000,8000,5000,12000,6000,9000,6000,7000,12000,7000  
672,8000,6000,5000,10000,9000,3000,9000,10000,9000,6000,4000,9000  
673,7000,10000,8000,7000,13000,7000,6000,4000,6000,5000,11000,9000  
674,8000,5000,13000,5000,12000,5000,13000,13000,6000,10000,15000,5000  
675,13000,10000,6000,10000,11000,11000,10000,13000,9000,13000,14000,11000  
676,10000,4000,6000,10000,7000,7000,10000,13000,10000,6000,12000,13000  
677,7000,8000,11000,10000,6000,10000,12000,12000,11000,9000,11000,4000  
678,14000,12000,8000,20000,18000,10000,14000,8000,9000,14000,9000,8000  
679,7000,7000,11000,14000,16000,18000,16000,7000,20000,8000,10000,14000  
680,12000,15000,11000,12000,10000,11000,9000,21000,14000,11000,9000,11000  
681,22000,18000,20000,20000,16000,29000,16000,11000,18000,14000,11000,8000  
682,17000,14000,23000,17000,19000,16000,23000,24000,17000,16000,19000,15000  
683,22000,28000,31000,33000,24000,37000,25000,27000,23000,28000,28000,19000  
684,34000,32000,40000,41000,43000,38000,48000,42000,34000,28000,26000,24000  
685,53000,37000,54000,60000,54000,55000,49000,39000,43000,46000,30000,37000  
686,71000,62000,68000,87000,59000,61000,60000,55000,52000,64000,46000,57000  
687,99000,88000,82000,76000,82000,75000,86000,93000,71000,86000,62000,59000  
688,102000,100000,99000,110000,89000,86000,84000,97000,82000,106000,63000,76000  
689,80000,90000,96000,93000,95000,103000,117000,84000,107000,103000,104000,77000  
690,67000,81000,91000,97000,79000,88000,80000,97000,100000,127000,117000,100000  
691,62000,82000,64000,78000,76000,89000,100000,94000,100000,121000,104000,101000  
692,57000,61000,53000,78000,68000,72000,79000,89000,90000,95000,85000,119000  
693,75000,54000,66000,53000,75000,64000,79000,93000,82000,97000,76000,87000  
694,73000,75000,55000,84000,84000,89000,105000,72000,93000,81000,77000,82000  
695,58000,72000,72000,97000,60000,85000,83000,102000,83000,85000,75000,77000  
696,84000,92000,93000,90000,94000,91000,81000,86000,101000,88000,82000,77000  
697,96000,115000,89000,118000,100000,99000,98000,98000,102000,104000,100000,100000  
698,138000,121000,122000,109000,122000,98000,135000,116000,88000,109000,102000,115000  
699,112000,111000,113000,123000,122000,118000,96000,152000,105000,124000,114000,118000  
700,96000,123000,116000,122000,119000,127000,98000,130000,115000,122000,133000,117000  
701,80000,77000,101000,97000,103000,121000,94000,108000,89000,113000,102000,127000  
702,59000,63000,73000,76000,57000,104000,94000,103000,103000,100000,85000,112000  
703,41000,51000,41000,61000,63000,39000,64000,67000,74000,77000,68000,71000  
704,32000,33000,30000,42000,32000,37000,29000,51000,45000,41000,50000,45000  
705,15000,11000,20000,29000,19000,22000,27000,28000,22000,26000,21000,23000  
706,19000,10000,10000,12000,16000,12000,13000,14000,22000,26000,26000,25000  
707,10000,6000,11000,13000,17000,20000,16000,8000,8000,19000,16000,16000  
708,6000,11000,10000,5000,8000,6000,10000,10000,12000,7000,16000,18000  
709,15000,9000,6000,10000,12000,8000,8000,8000,6000,8000,8000,13000  
710,6000,9000,9000,9000,11000,4000,7000,2000,11000,3000,12000,2000  
711,5000,1000,8000,6000,6000,5000,3000,9000,7000,7000,13000,10000  
712,5000,5000,5000,8000,10000,7000,6000,4000,3000,7000,9000,6000  
713,5000,5000,0,7000,14000,2000,4000,4000,6000,4000,7000,4000  
714,6000,8000,10000,7000,6000,3000,6000,6000,8000,7000,7000,7000  
715,2000,6000,6000,4000,6000,2000,9000,6000,11000,4000,9000,8000  
716,4000,1000,7000,6000,7000,4000,4000,8000,3000,9000,6000,11000  
717,0,6000,4000,8000,7000,4000,3000,7000,5000,5000,7000,5000  
718,5000,6000,2000,4000,5000,6000,5000,4000,5000,6000,6000,6000  
719,3000,2000,2000,5000,3000,7000,4000,8000,4000,5000,5000,5000  
720,3000,5000,1000,4000,9000,8000,12000,3000,8000,5000,3000,2000
